# Supplementary material for: Solvent-free synthesis of quaternary α-hydroxy α-trifluoromethyl diazenes: the key step of a nucleophilic formylation strategy
Source: Royal Society of Chemistry journal article supplement (doi:10.1039/c6gc00408c), 2016-01-01

## Supporting Information

### *Efficient solvent-free synthesis of quaternary $\alpha$ -hydroxy $\alpha$ -trifluoromethyldiazenes: Key step of a nucleophilic formylation strategy*

Esteban Matador, David Monge,\* Rosario Fernández\* and José M. Lassaletta\*

|                                                   |               |
|---------------------------------------------------|---------------|
| <b>1. General Information</b>                     | <b>S2</b>     |
| <b>2. Optimization of the reaction conditions</b> | <b>S3</b>     |
| <b>3. <i>E-factor</i> calculation</b>             | <b>S4</b>     |
| <b>4. Scaling-up of the model reaction</b>        | <b>S5-S6</b>  |
| <b>5. NMR spectra for new compounds</b>           | <b>S7-S48</b> |

## 1. General Information.

Spectra were recorded at [ $^1\text{H}$  NMR (300 or 500 MHz);  $^{13}\text{C}$  NMR (75.5 MHz);  $^{19}\text{F}$  NMR (470.6 MHz)] with the solvent peak used as the internal reference (7.26 and 77.0 ppm for  $^1\text{H}$  and  $^{13}\text{C}$  respectively). Column chromatography was performed on silica gel (Merck Kieselgel 60). Analytical TLC was performed on aluminum backed plates (1.5 × 5 cm) pre-coated (0.25 mm) with silica gel (Merck, Silica Gel 60 F254). Compounds were visualized by exposure to UV light or by dipping the plates in solutions of  $\text{KMnO}_4$ , vanillin or phosphomolibdic acid stains followed by heating. Melting points were recorded in a metal block and are uncorrected. Unless otherwise noted, analytical grade solvents and commercially available reagents were used without further purification. Formaldehyde hydrazones **2-4**<sup>1</sup> and not commercially available trifluoromethylketones **1**<sup>2</sup> were synthesized according to literature procedures.

---

<sup>1</sup> J.-S. M. Lehn, S. Javed, D. M. Hoffman, *Inorg. Chem.* 2007, 46, 993.

<sup>2</sup> Trifluoromethyl ketones **1** were prepared by Grignard reagent addition to 2,2,2-ethyltrifluoroacetate: a) For characterization of trifluoromethyl ketone **1g** see K. Fuchibe, H. Jyono, M. Fujiwara, T. Kudo, M. Yokota, and J. Ichiwaka, *Chem. Eur. J.* 2011, **17**, 12175. For characterization of trifluoromethyl ketone **1i** see E. Massolo, M. Benaglia, M. Orlandini, S. Rossi, and G. Celentano, *Chem. Eur. J.* 2015, **21**, 3589.

## 2. Optimization of the reaction conditions.

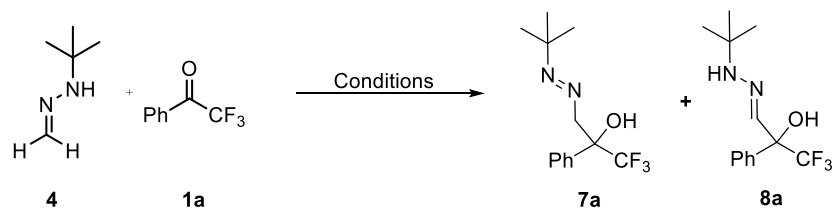

**Table 1.** Results obtained.

| Method   | Entry | Solvent                         | t      | <b>7a:8a</b> | Yield (%) | <i>E</i> -factor | <i>E</i> -factor (global process) |
|----------|-------|---------------------------------|--------|--------------|-----------|------------------|-----------------------------------|
| <b>A</b> | 1     | CH <sub>2</sub> Cl <sub>2</sub> | 9 h    | 10:0         | 83        | 12.06            | 2193                              |
|          | 2     | CHCl <sub>3</sub>               | 7 h    | 8:2          | 70        | 16.29            | 2602                              |
|          | 3     | <i>n</i> -hexane                | 31 h   | 10:0         | 80        | 6.48             | 2269                              |
|          | 4     | toluene                         | 31 h   | 10:0         | 81        | 8.26             | 2243                              |
|          | 5     | Et <sub>2</sub> O               | 31 h   | 10:0         | 74        | 7.62             | 2454                              |
|          | 6     | CH <sub>3</sub> CN              | 6 h    | 10:0         | 90        | 6.68             | 2018                              |
| <b>B</b> | 7     | H <sub>2</sub> O                | 45 min | 10:0         | 90        | 1.31             | 43                                |
| <b>C</b> | 8     | --                              | 20 min | 10:0         | >99       | 0.18             | 0,18                              |

### Method A

Freshly distilled formaldehyde *tert*-butylhydrazone **4** (79  $\mu$ L, 0.75 mmol) was added to a solution of 2,2,2-trifluoro-1-phenylethan-1-one (**1a**) (70  $\mu$ L, 0.5 mmol) in the corresponding organic solvent (1 mL) at room temperature. The mixture was stirred for the time specified in each solvent (**Table 1**, tlc monitoring). After completion of the reaction, the solvent was removed under reduced pressure and the crude was purified by flash chromatography (hexane/CH<sub>2</sub>Cl<sub>2</sub>, 1/1) to afford the pure diazene **7a**.

### Method B

Freshly distilled formaldehyde *tert*-butylhydrazone **4** (79  $\mu$ L, 0.75 mmol) was added to a emulsion of 2,2,2-trifluoro-1-phenylethan-1-one (**1a**) (70  $\mu$ L, 0.5 mmol) in water (1 mL) at room temperature. The mixture was stirred for 45 minutes (tlc monitoring). The organic phase was extracted with Et<sub>2</sub>O (2x3 mL) and the combined organic layers were dried over anhydrous MgSO<sub>4</sub>, filtered and the solvent removed under reduced pressure to afford the pure diazene **7a** (123 mg, 90%).

### Method C

Freshly distilled formaldehyde *tert*-butylhydrazone **4** (79  $\mu$ L, 0.75 mmol) was added to 2,2,2-trifluoro-1-phenylethan-1-one (**1a**) (70  $\mu$ L, 0.5 mmol) at room temperature. The mixture was stirred for 20 minutes (tlc monitoring) and the hydrazone excess was removed under reduced pressure to afford the pure diazene **7a** (135 mg, 99%).

### 3. E-factor calculation.

The E-factor is the measure of the amount of a waste generated while making a product. The simple ratio of units of waste divided by units of product tells us that the lower the E-factor, the less waste is produced. In this case, for the model reaction *E-factor* was calculated as follow:

$$E_{factor} = \frac{\text{Amount of waste}}{\text{Amount of final product}} = \frac{\text{Amount of all reactants} - \text{Amount of final product}}{\text{Amount of final product}} =$$

$$= \frac{(\text{Amount of hydrazone } \mathbf{4} + \text{Amount of ketone } \mathbf{1a} + \text{Amount of solvent}) - \text{Amount of diazene } \mathbf{7a}}{\text{Amount of diazene } \mathbf{7a}}$$

| Entry                                       | Hydrazone <b>1a</b> (mg) | Ketone <b>3a</b> (mg) | <b>1a/3a</b> ratio | Solvent (mL) | Density solvent (mg/mL) | Solvent (mg) | Diazene <b>4a</b> | <i>E-factor</i> | Solvent elaboration (mg) <sup>a</sup> | <i>E-factor</i> (global process) |
|---------------------------------------------|--------------------------|-----------------------|--------------------|--------------|-------------------------|--------------|-------------------|-----------------|---------------------------------------|----------------------------------|
| <b>1</b> (CH <sub>2</sub> Cl <sub>2</sub> ) | 75                       | 87                    | 1.5/1              | 1            | 1,33E+03                | 1,33E+03     | 114               | 12,08           | 2,48E+05                              | 2193                             |
| <b>2</b> (CHCl <sub>3</sub> )               | 75                       | 87                    | 1.5/1              | 1            | 1,50E+03                | 1,50E+03     | 96                | 16,31           | 2,48E+05                              | 2602                             |
| <b>3</b> ( <i>n</i> -hexane)                | 75                       | 87                    | 1.5/1              | 1            | 6,59E+02                | 6,59E+02     | 110               | 6,49            | 2,48E+05                              | 2269                             |
| <b>4</b> (toluene)                          | 75                       | 87                    | 1.5/1              | 1            | 8,67E+02                | 8,67E+02     | 111               | 8,27            | 2,48E+05                              | 2243                             |
| <b>5</b> (Et <sub>2</sub> O)                | 75                       | 87                    | 1.5/1              | 1            | 7,13E+02                | 7,13E+02     | 101               | 7,63            | 2,48E+05                              | 2454                             |
| <b>6</b> (CH <sub>3</sub> CN)               | 75                       | 87                    | 1.5/1              | 1            | 7,86E+02                | 7,86E+02     | 123               | 6,69            | 2,48E+05                              | 2018                             |
| <b>7</b> (H <sub>2</sub> O)                 | 75                       | 87                    | 1.5/1              | 1            | 9,98E+02                | 9,98E+02     | 123               | 8,41            | 2,14E+04                              | 43                               |
| <b>8</b> (no solvent)                       | 75                       | 87                    | 1.5/1              | -            | -                       | -            | 137               | 0,18            | -                                     | 0,18                             |
| <b>9</b> (no solvent)                       | 75                       | 87                    | 1.5/1              | -            | -                       | -            | 137               | 0,18            | -                                     | 0,18                             |
| <b>10</b> (no solvent)                      | 601                      | 1,04E+03              | 1/1                | -            | -                       | -            | 1,64E+03          | 0,0004          | -                                     | 0,0004                           |

<sup>a</sup>*E-factor* (global process) was calculated considering the volume of solvent spent during the purification or extraction process. *Organic solvents (1-6)*: Chromatography column was performed employing 250 mL of a mixture hexane/CH<sub>2</sub>Cl<sub>2</sub> 1/1. *Water (7)*: Extraction requires 6 mL of Et<sub>2</sub>O.

Molecular weights:

- Formaldehyde *tert*-butylhydrazone (**4**): 100.17 g/mol
- Trifluoromethyl ketone **1a**: 174.12 g/mol
- Diazene **7a**: 274.29 g/mol

#### 4. Scaling-up of the model reaction.

In this section some pictures of the scaling-up are shown. Hydrolysis, reductive amination and condensation with hydroxylamine are also included.

*Addition of formaldehyde tert-butylhydrazone **4** to trifluoromethylketone **1a***

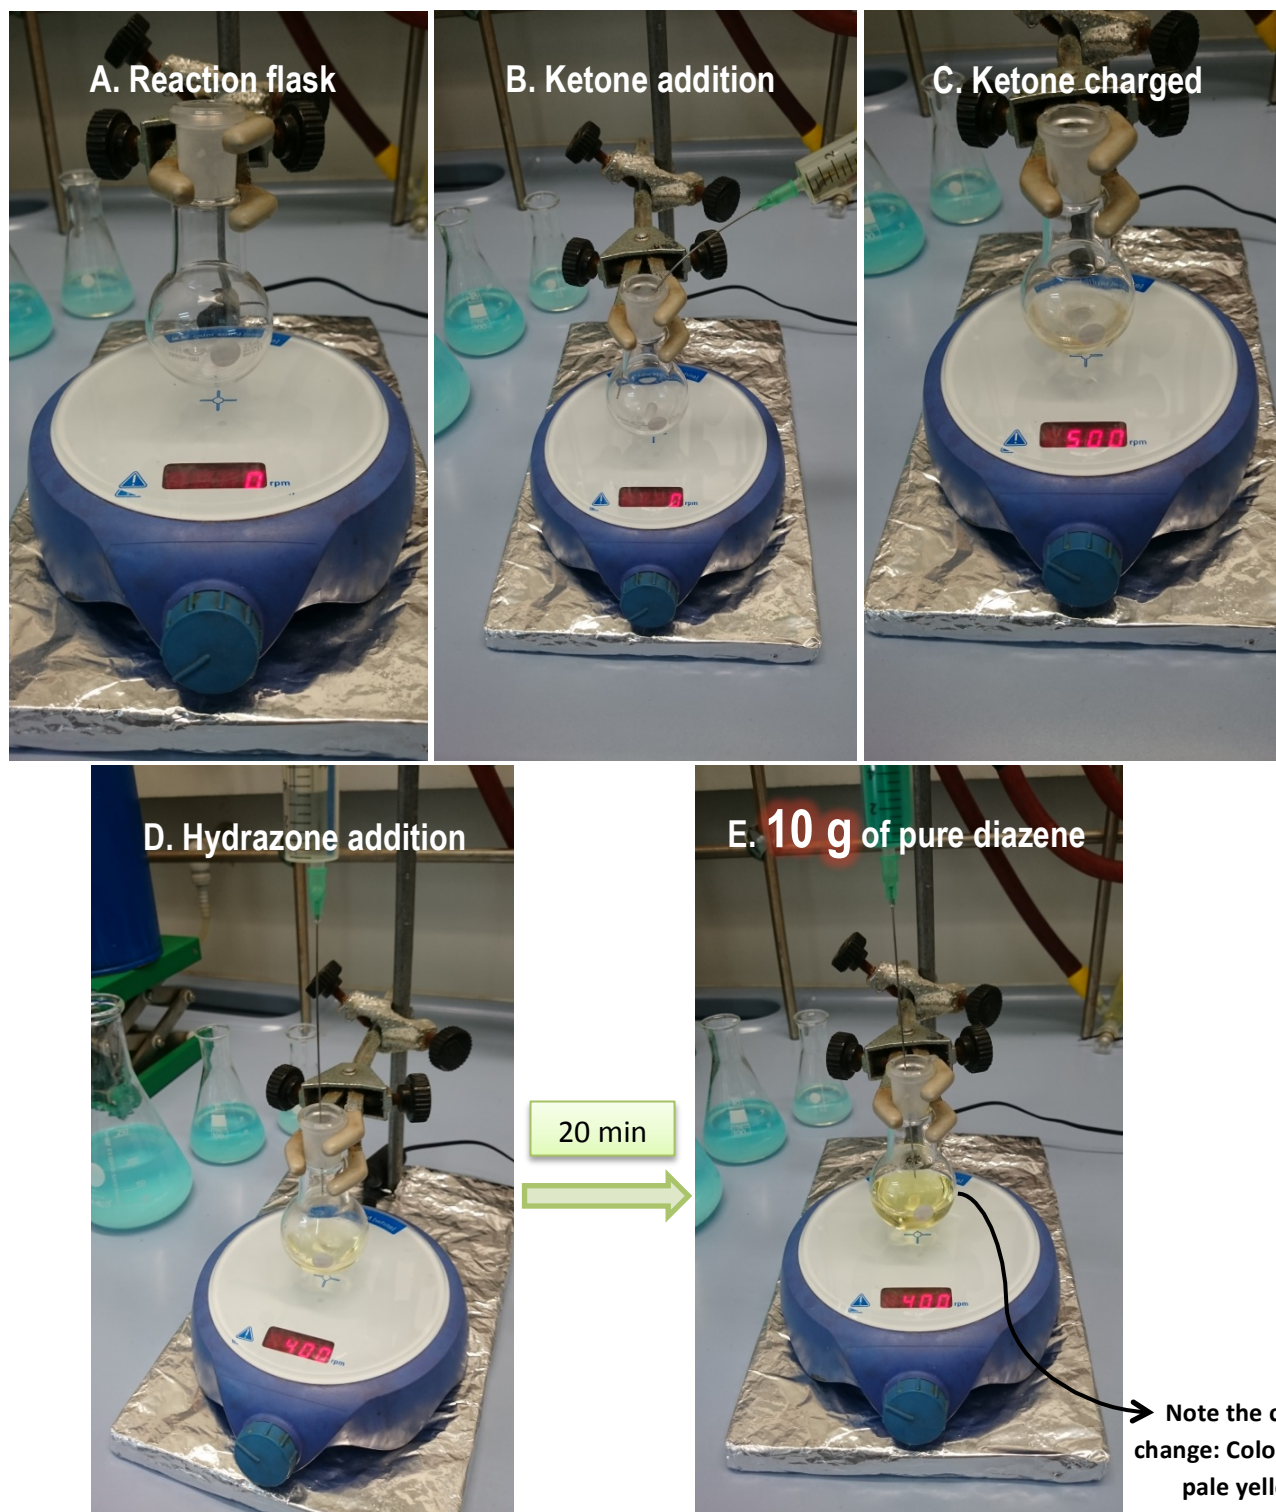

Hydrolysis of diazene **7a** to afford  $\alpha$ -hydroxyaldehyde **9a** in one-pot fashion  
and some of its transformations

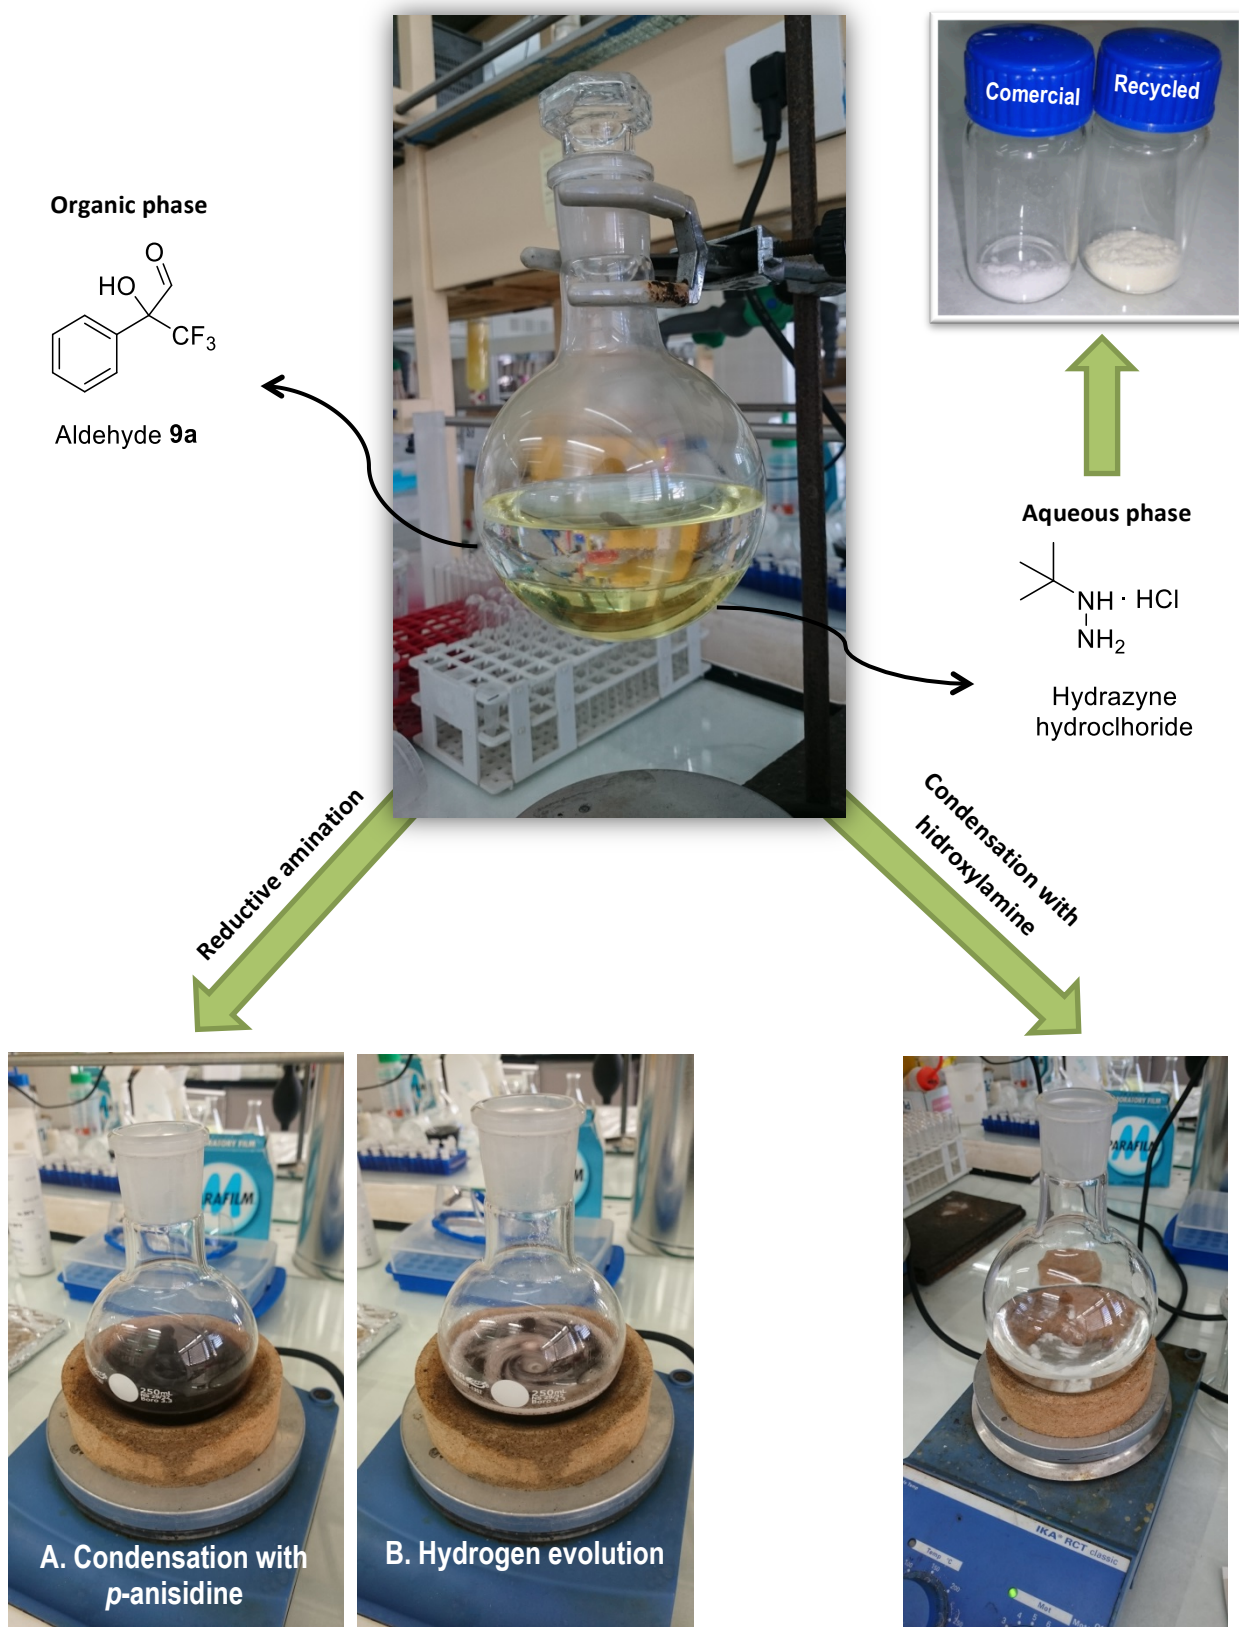

## 5. NMR spectra for new compounds

$^1\text{H}$  NMR ( $\text{CDCl}_3$ , 300 MHz) of **7a**

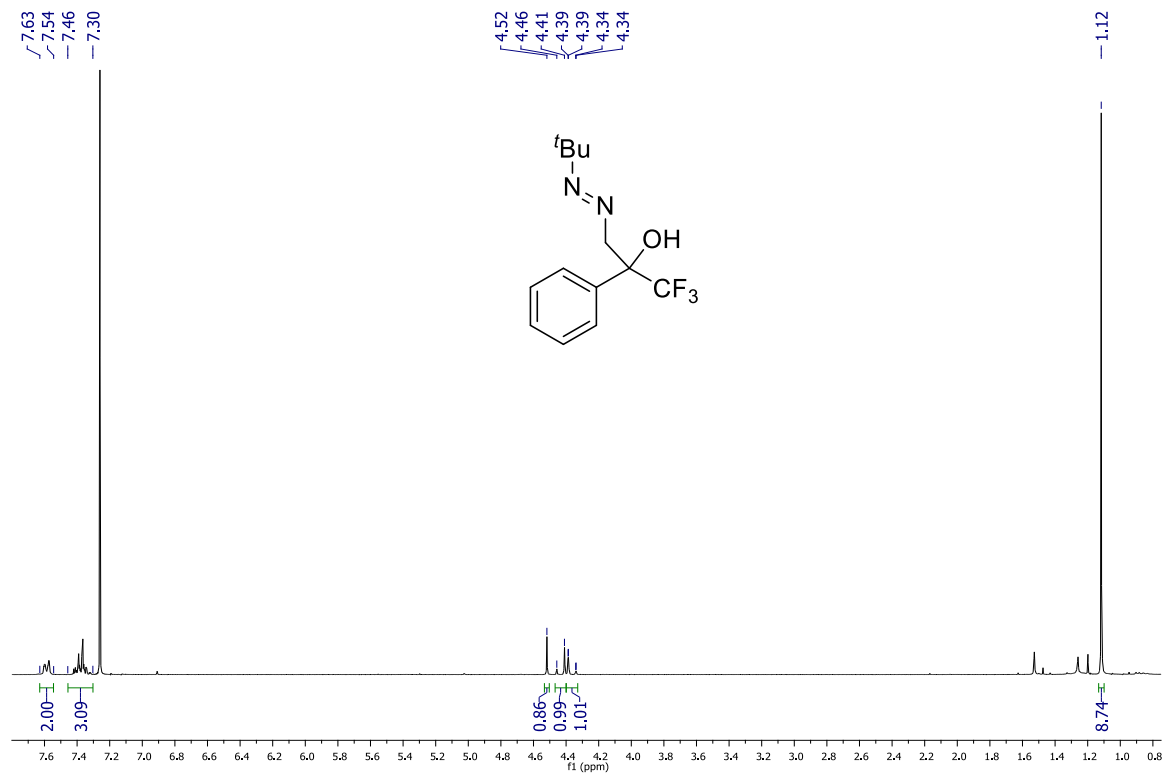

$^{13}\text{C}$  NMR ( $\text{CDCl}_3$ , 75.5 MHz) of **7a**

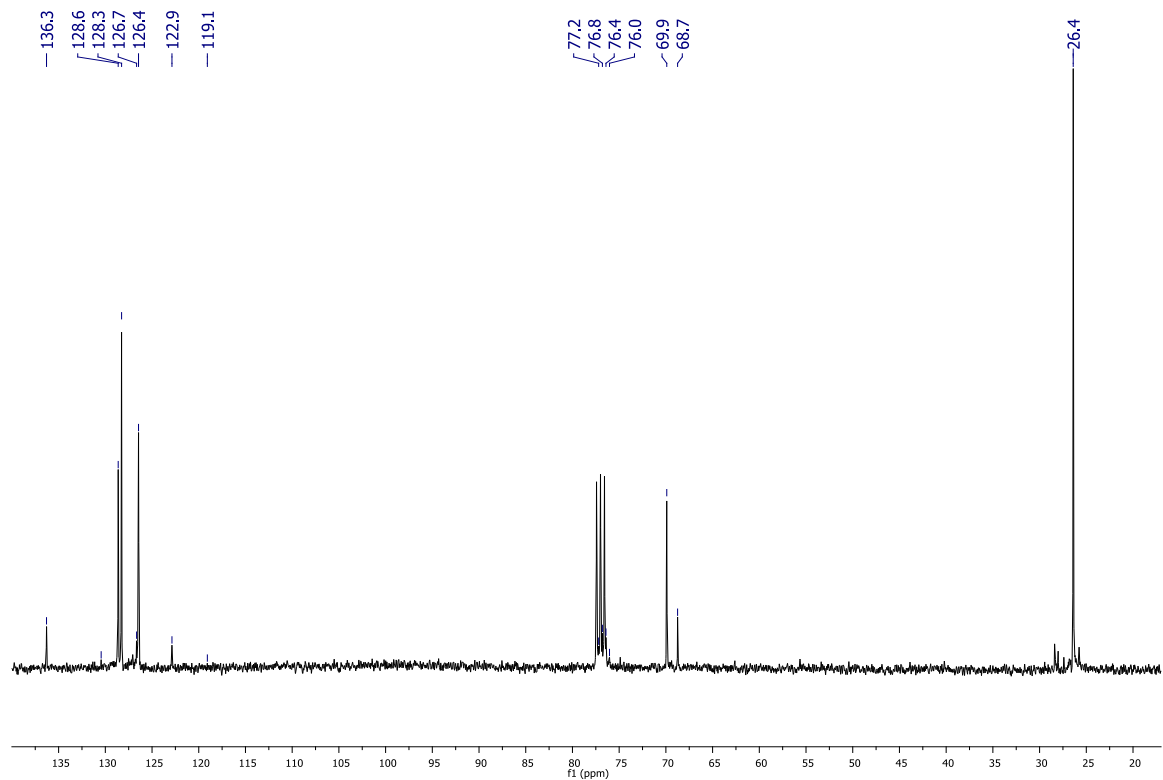

$^1\text{H}$  NMR ( $\text{CDCl}_3$ , 300 MHz) of **7b**

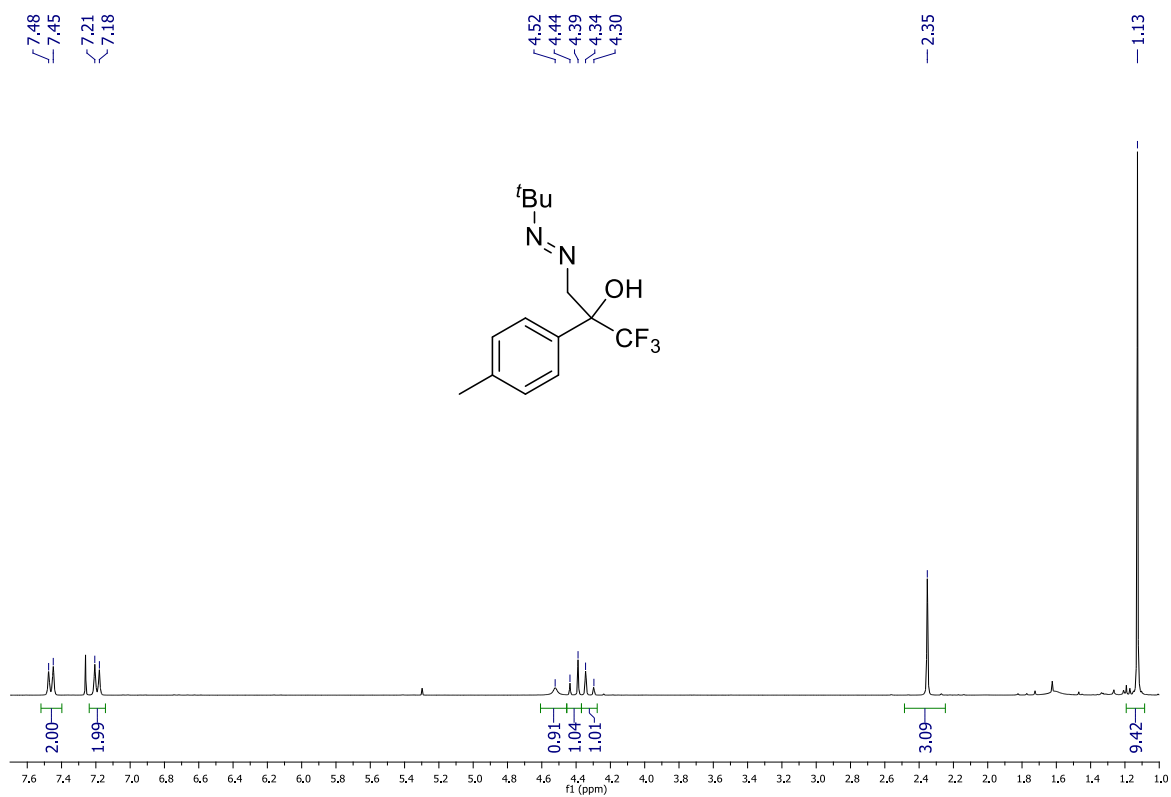

$^{13}\text{C}$  NMR ( $\text{CDCl}_3$ , 75.5 MHz) of **7b**

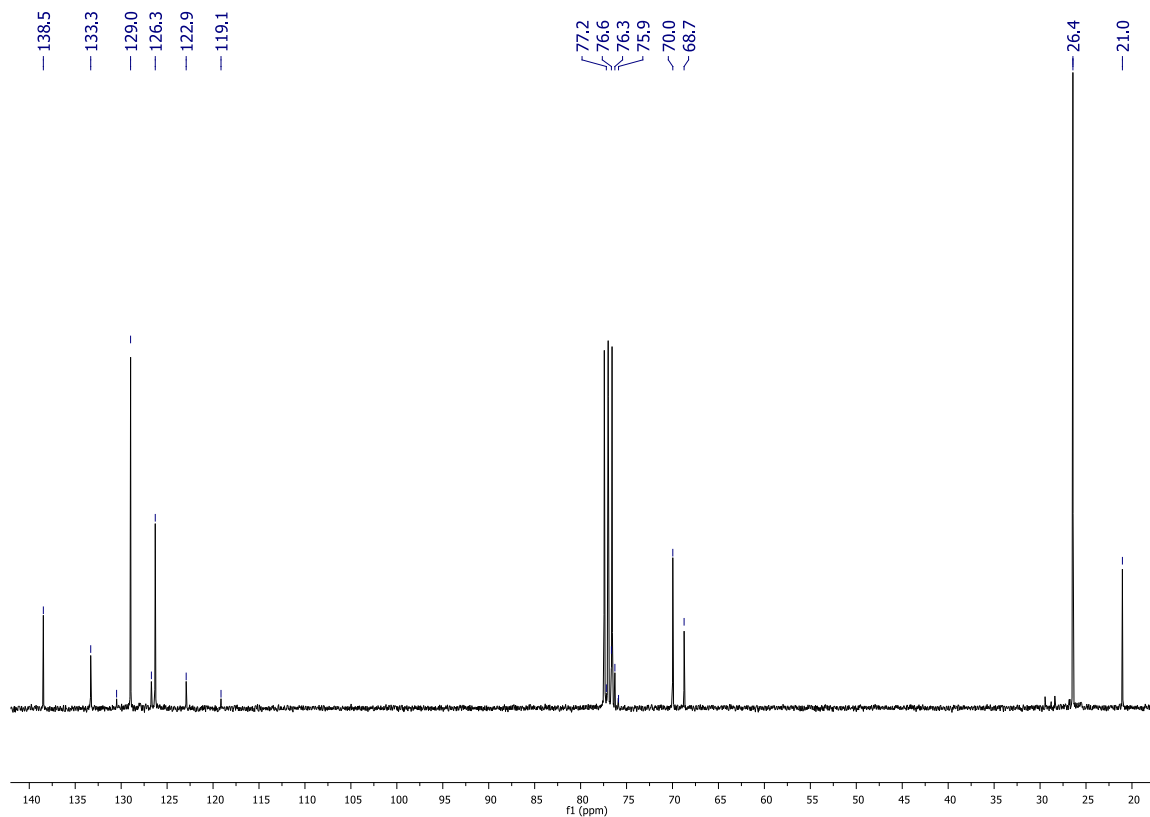

$^1\text{H}$  NMR ( $\text{CDCl}_3$ , 300 MHz) of **7c**

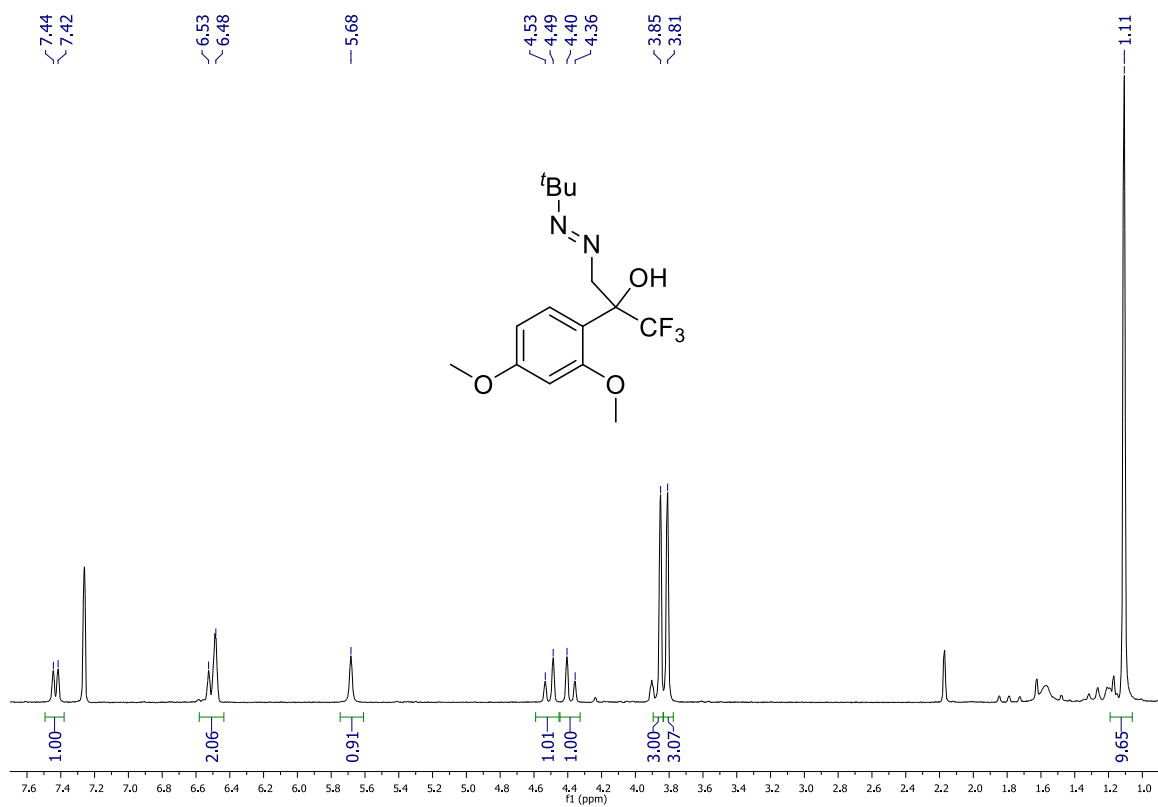

$^{13}\text{C}$  NMR ( $\text{CDCl}_3$ , 75.5 MHz) of **7c**

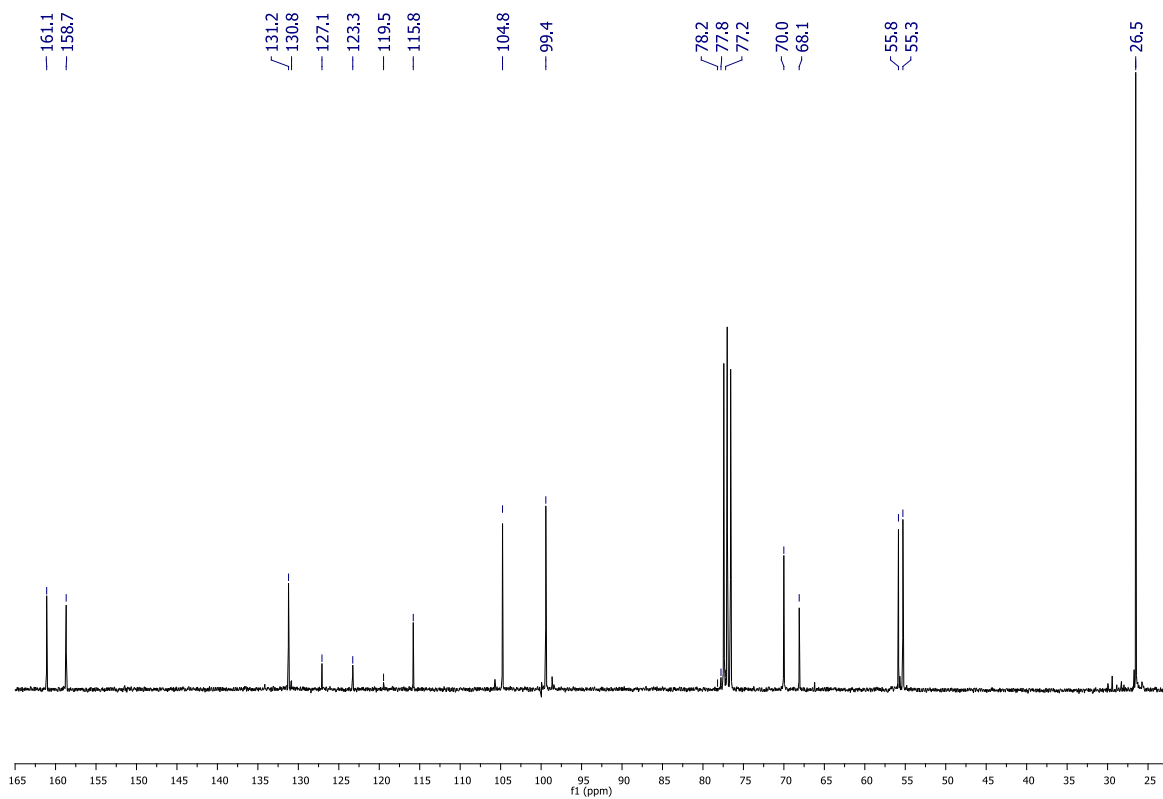

$^1\text{H}$  NMR ( $\text{CDCl}_3$ , 300 MHz) of **7d**

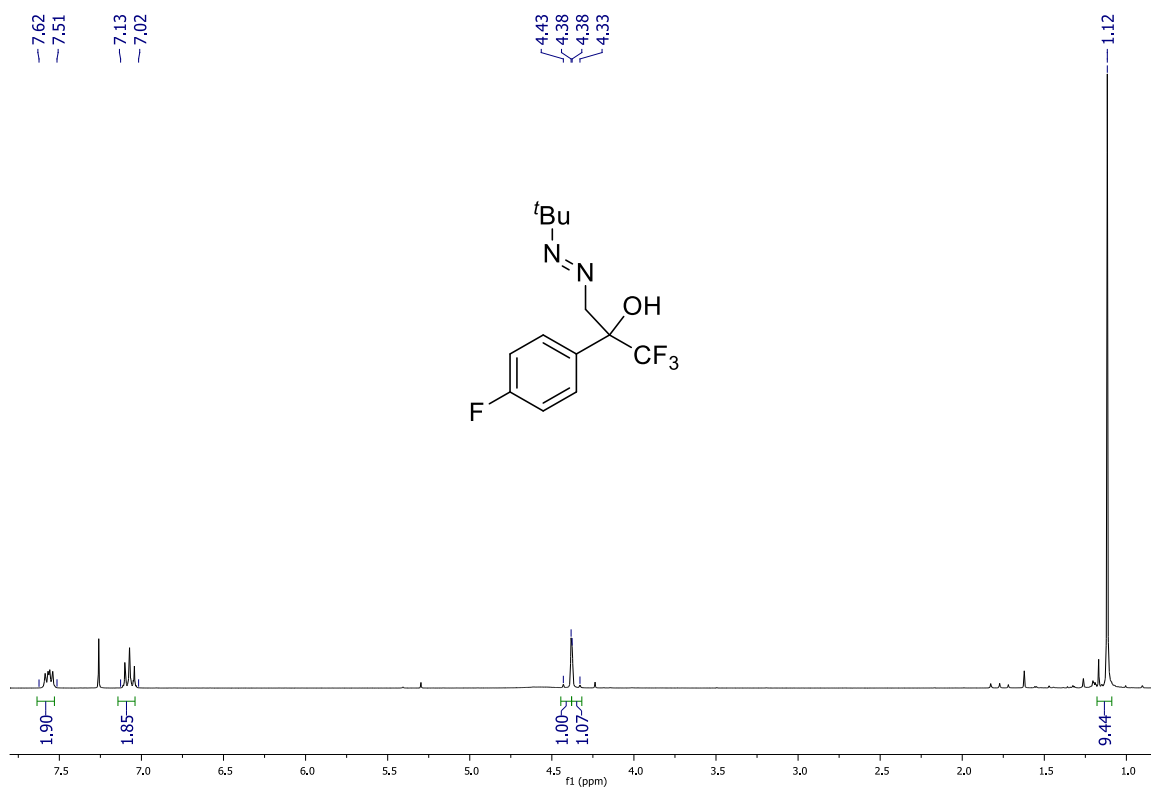

$^{13}\text{C}$  NMR ( $\text{CDCl}_3$ , 75.5 MHz) of **7d**

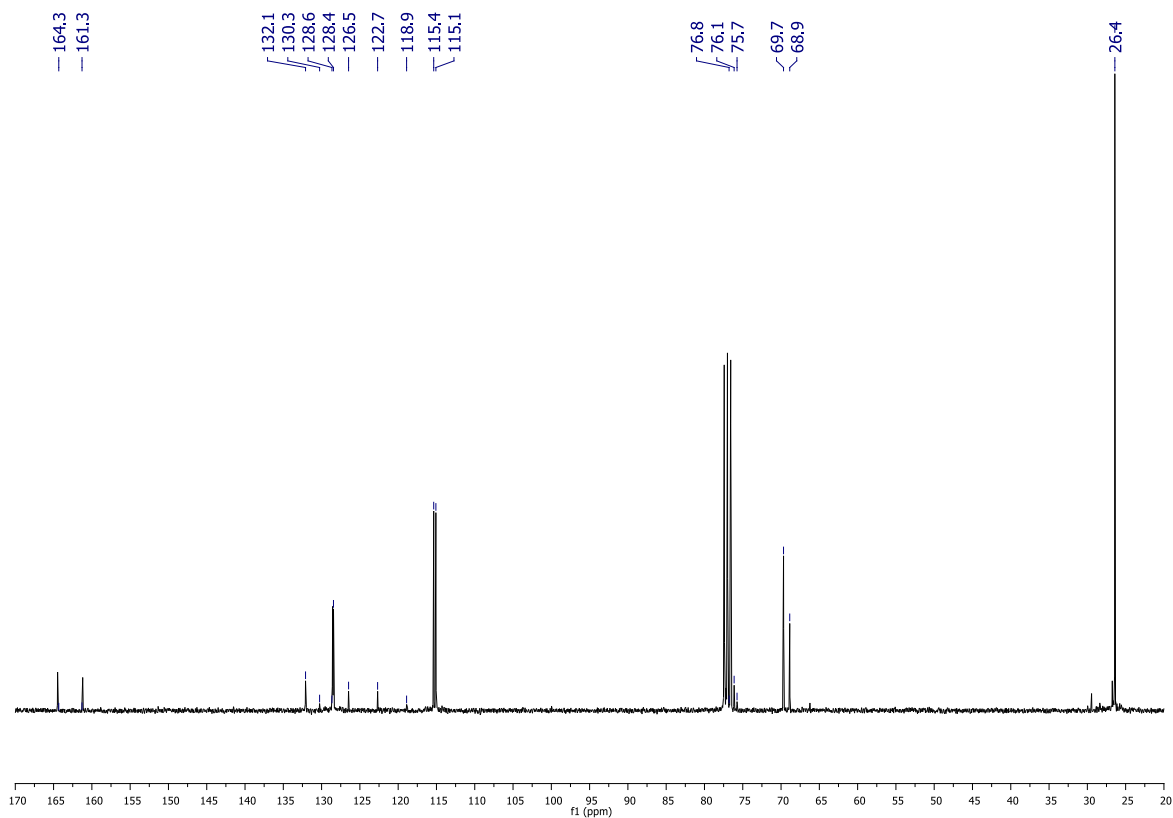

$^1\text{H}$  NMR ( $\text{CDCl}_3$ , 300 MHz) of **7e**

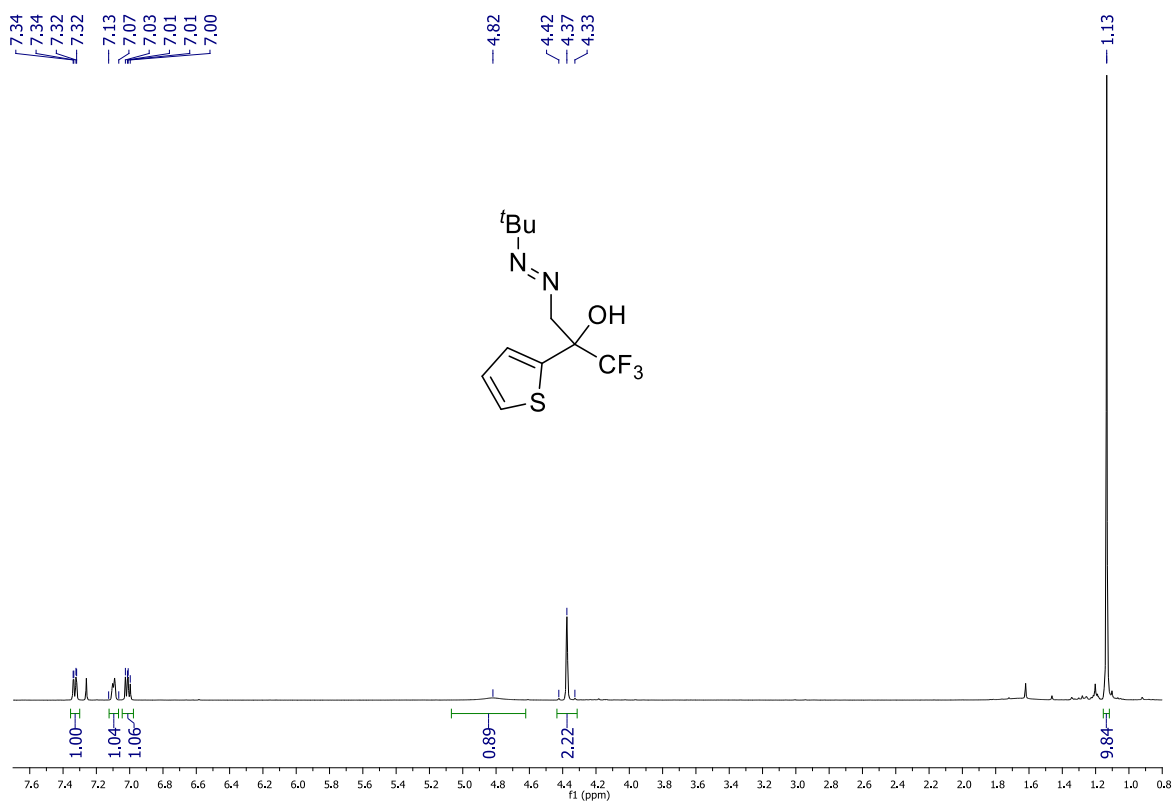

$^{13}\text{C}$  NMR ( $\text{CDCl}_3$ , 75.5 MHz) of **7e**

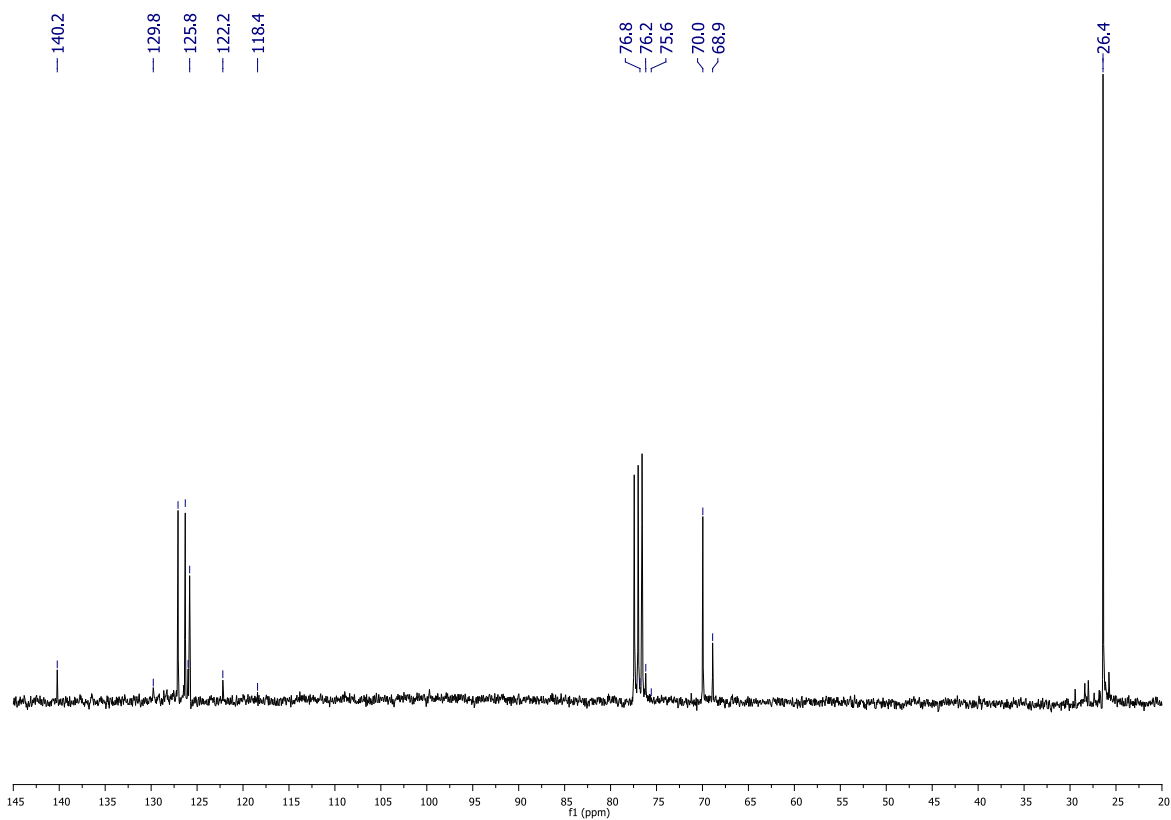

$^1\text{H}$  NMR ( $\text{CDCl}_3$ , 300 MHz) of **7f**

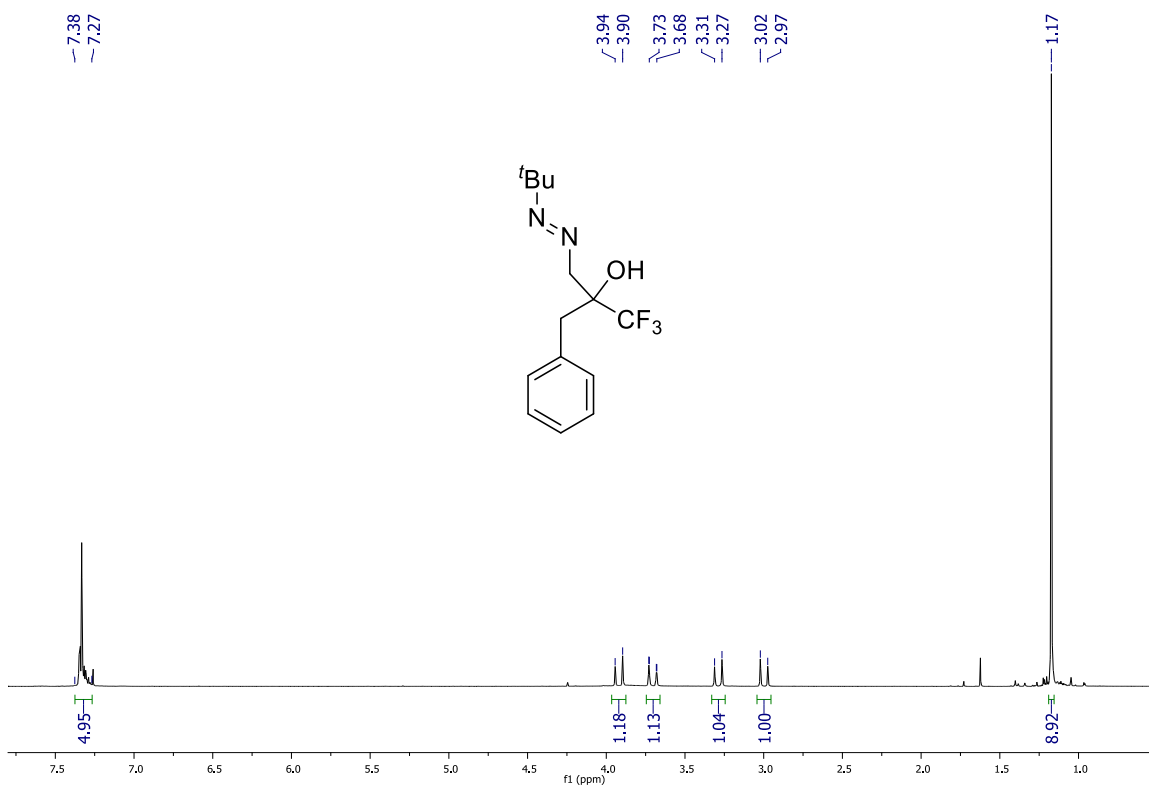

$^{13}\text{C}$  NMR ( $\text{CDCl}_3$ , 75.5 MHz) of **7f**

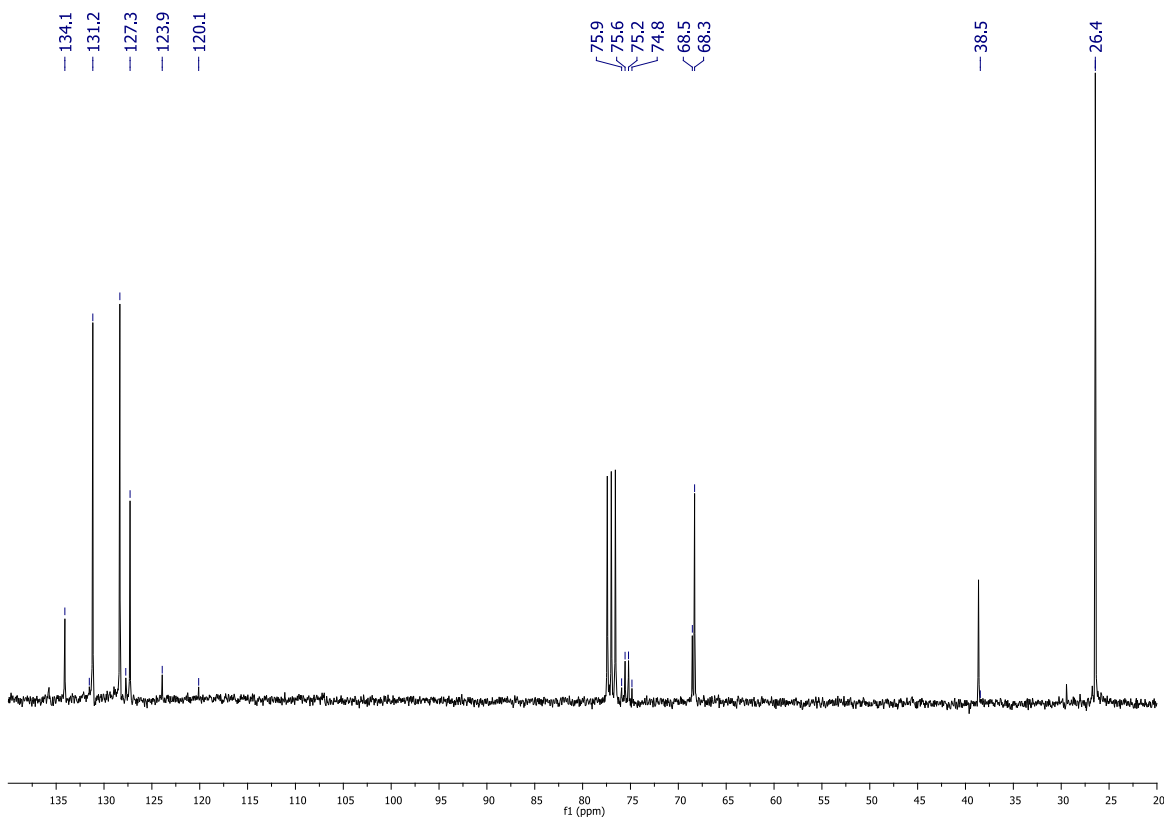

$^1\text{H}$  NMR ( $\text{CDCl}_3$ , 300 MHz) of **7g**

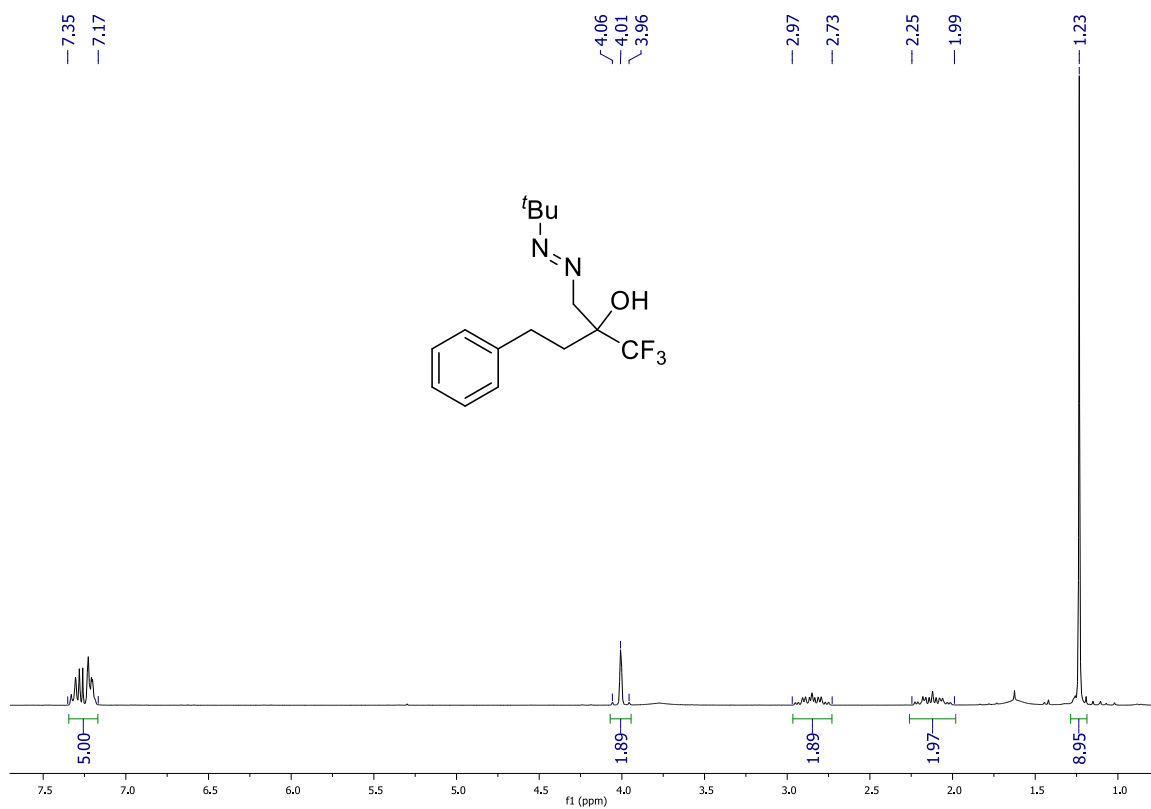

$^{13}\text{C}$  NMR ( $\text{CDCl}_3$ , 75.5 MHz) of **7g**

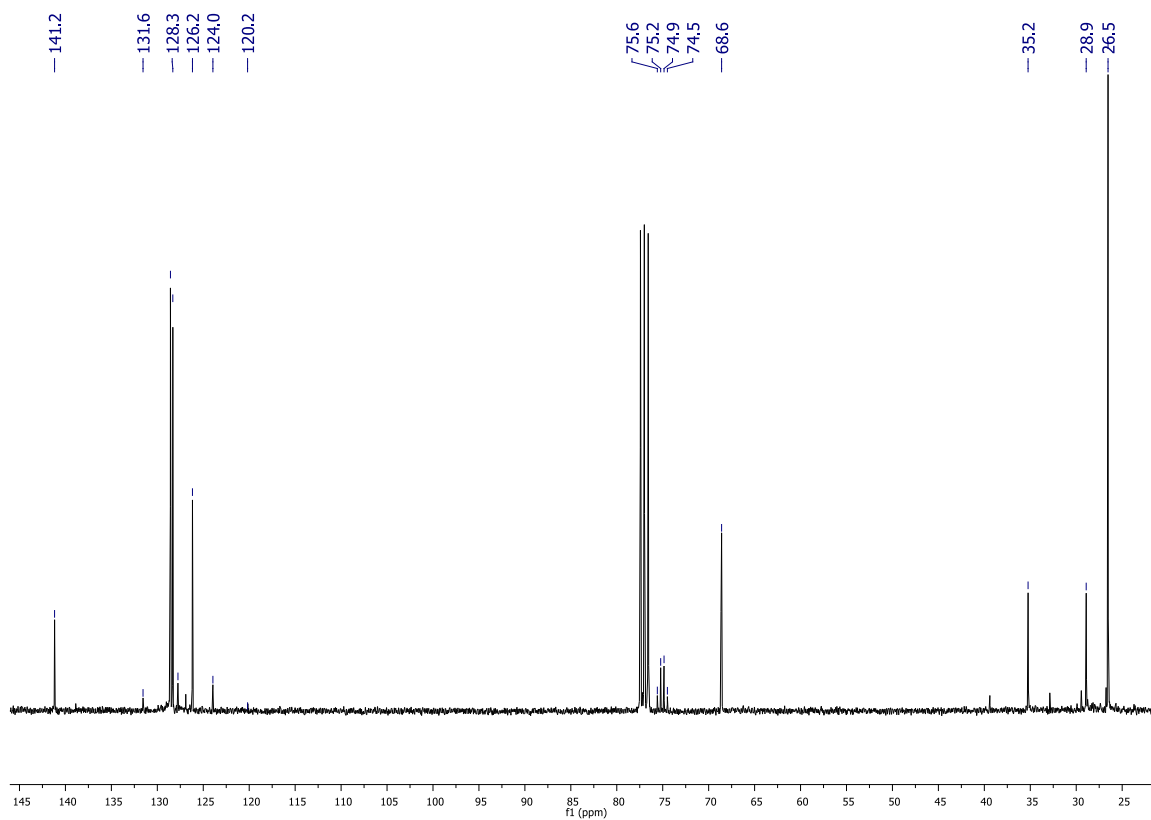

$^1\text{H}$  NMR ( $\text{CD}_2\text{Cl}_2$ , 300 MHz) of **7h**

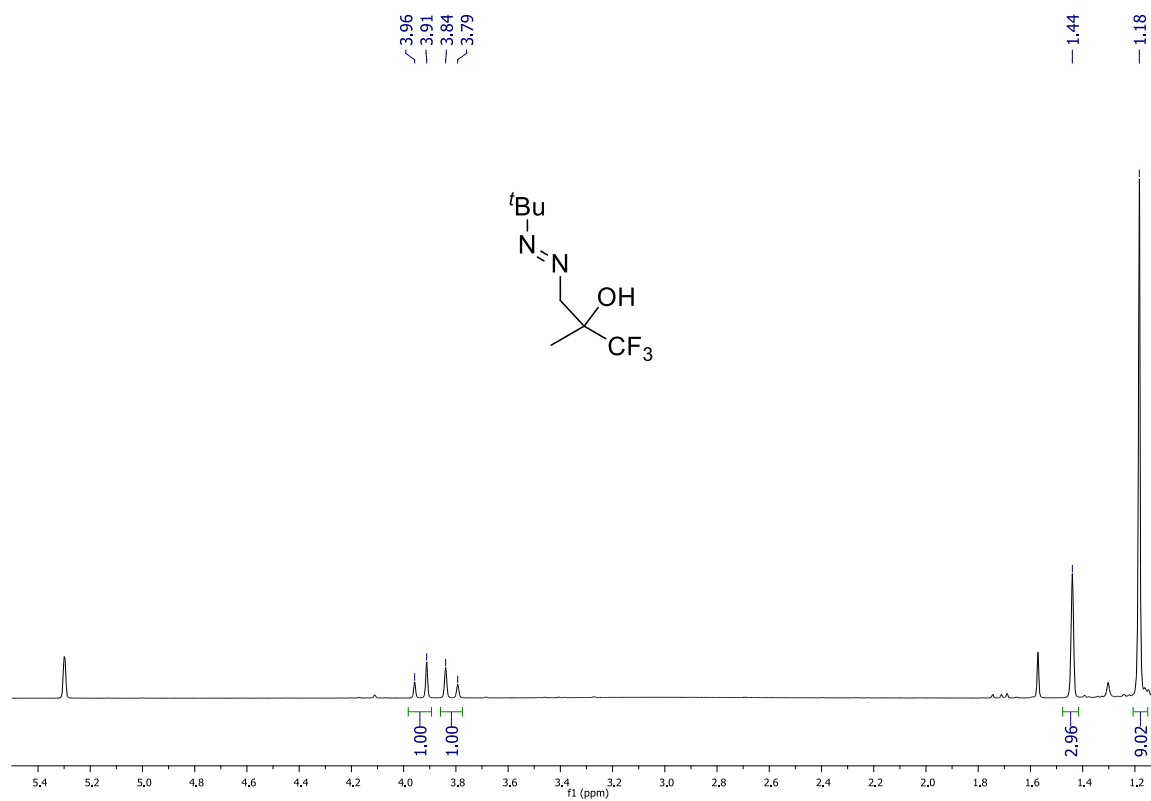

$^{13}\text{C}$  NMR ( $\text{CD}_2\text{Cl}_2$ , 125 MHz) of **7h**

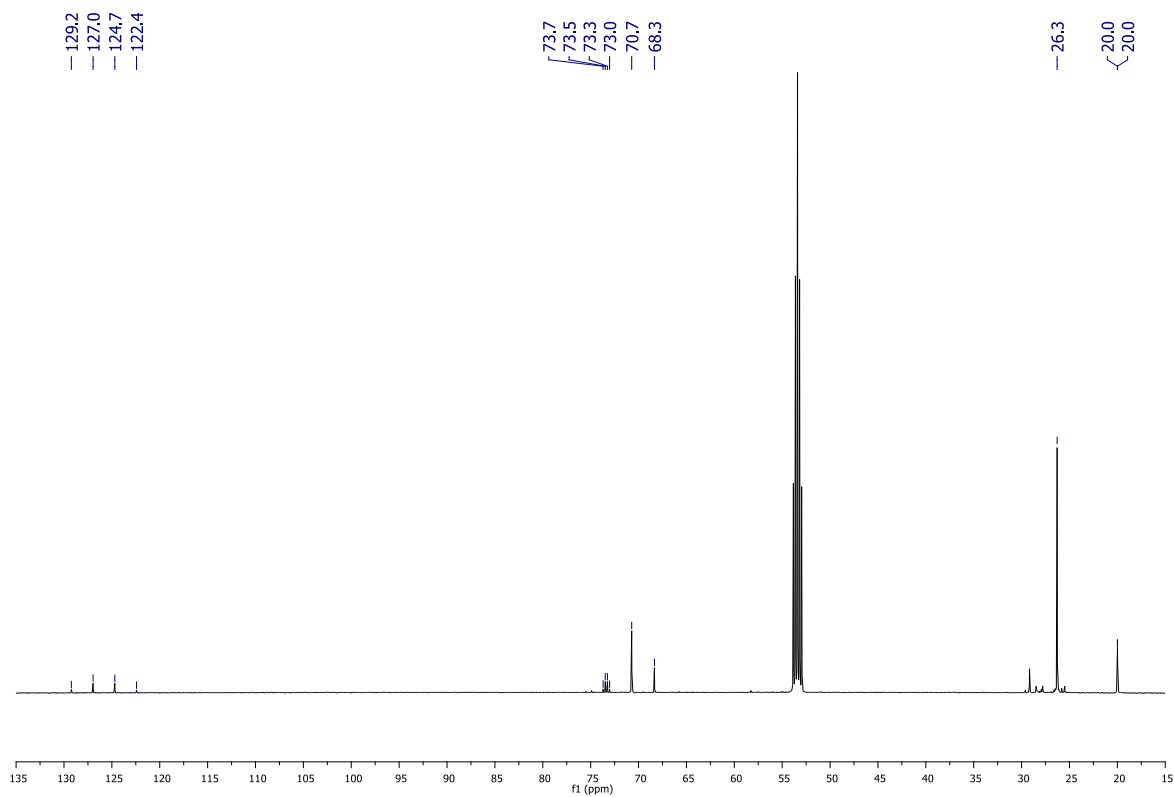

$^1\text{H}$  NMR ( $\text{CDCl}_3$ , 300 MHz) of **7i**

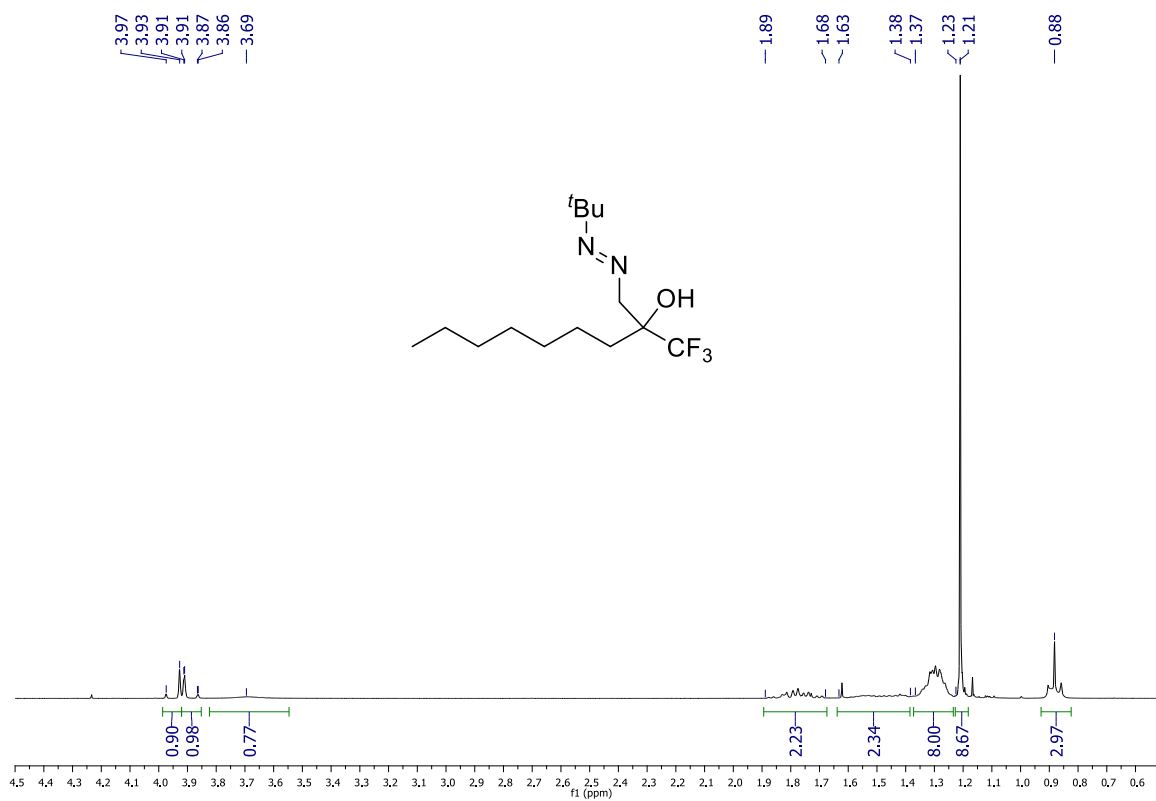

$^{13}\text{C}$  NMR ( $\text{CDCl}_3$ , 75.5 MHz) of **7i**

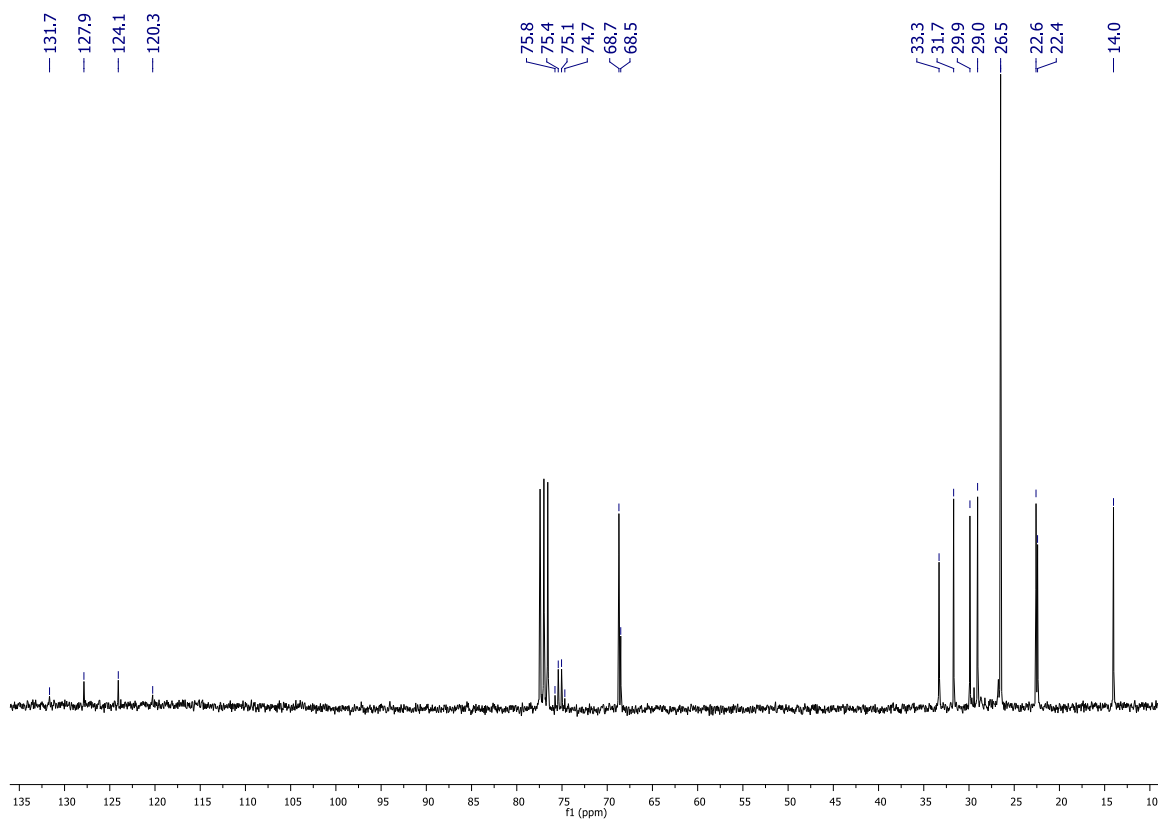

$^1\text{H}$  NMR ( $\text{CDCl}_3$ , 300 MHz) of **7j**

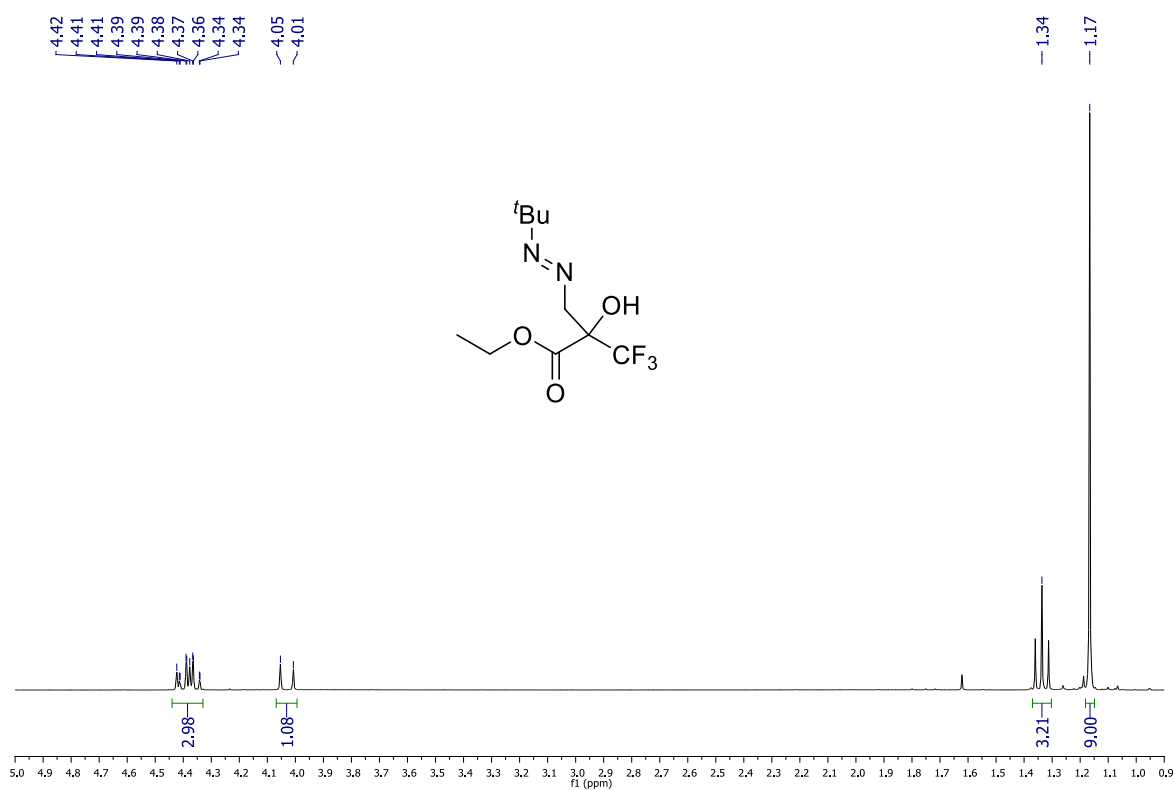

$^{13}\text{C}$  NMR ( $\text{CDCl}_3$ , 75.5 MHz) of **7j**

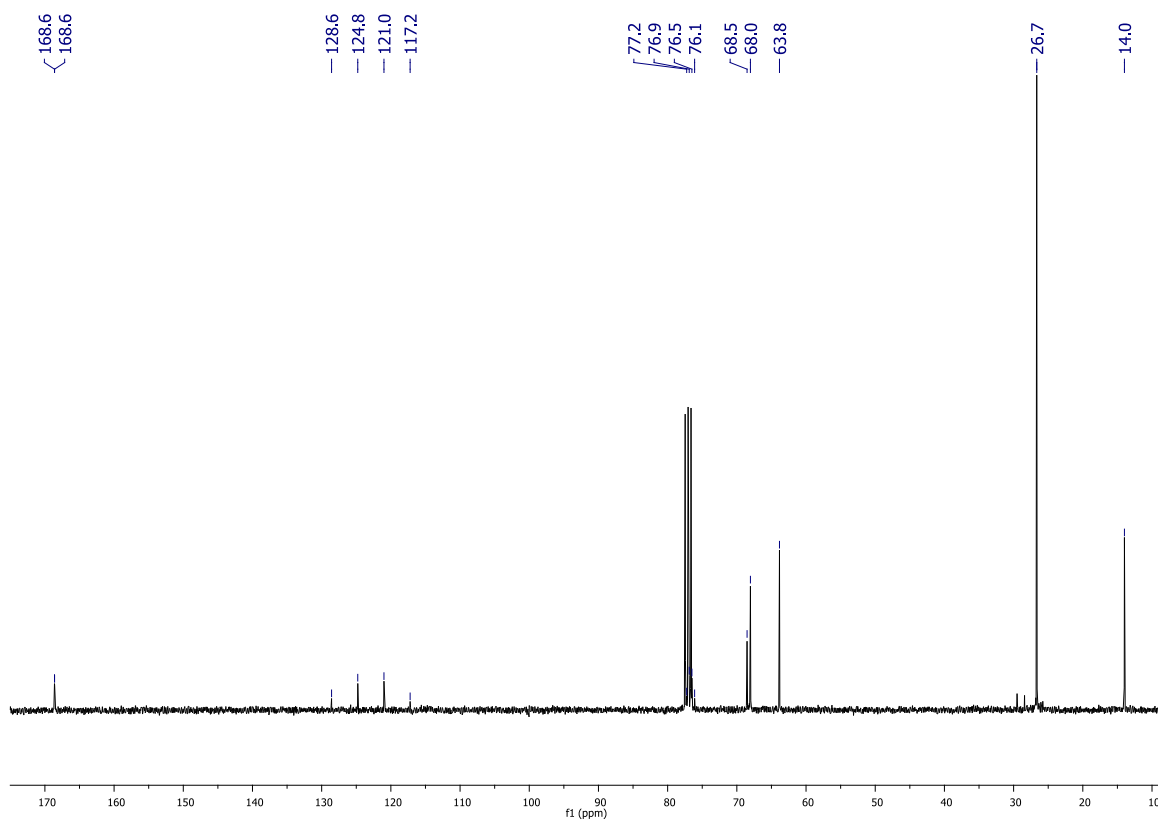

$^1\text{H}$  NMR ( $\text{CDCl}_3$ , 300 MHz) of **8a**

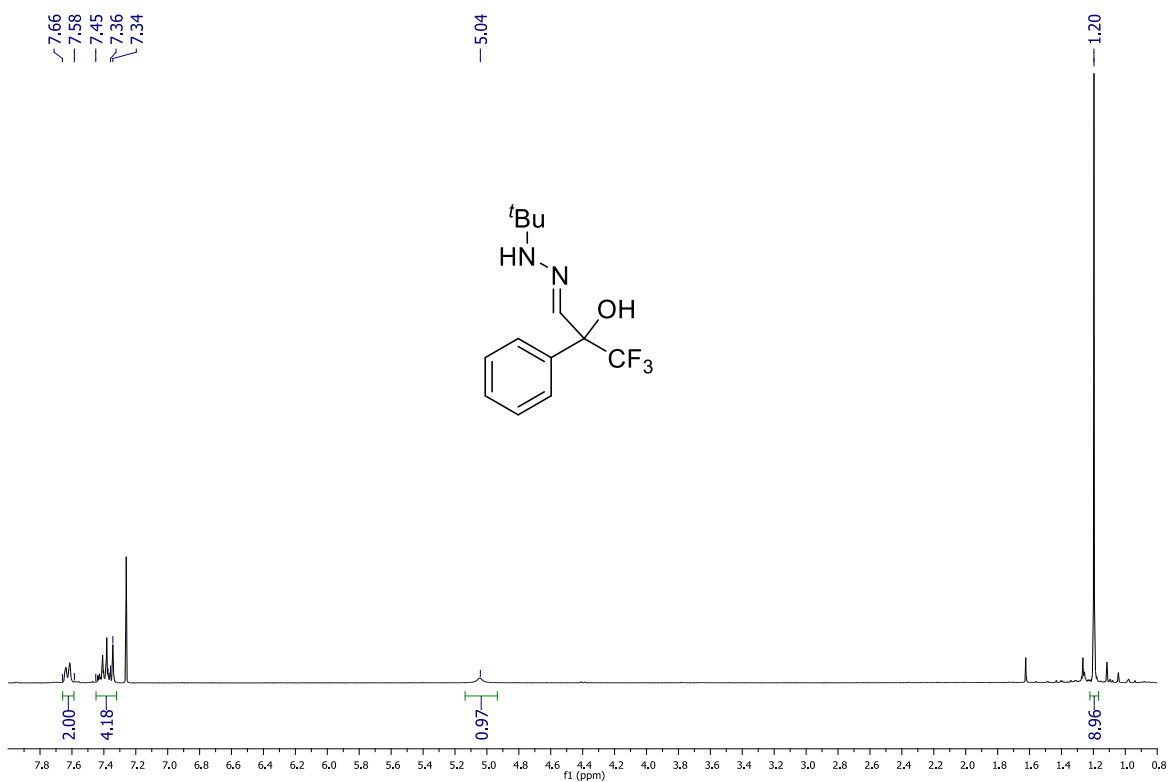

$^{13}\text{C}$  NMR ( $\text{CDCl}_3$ , 75.5 MHz) of **8a**

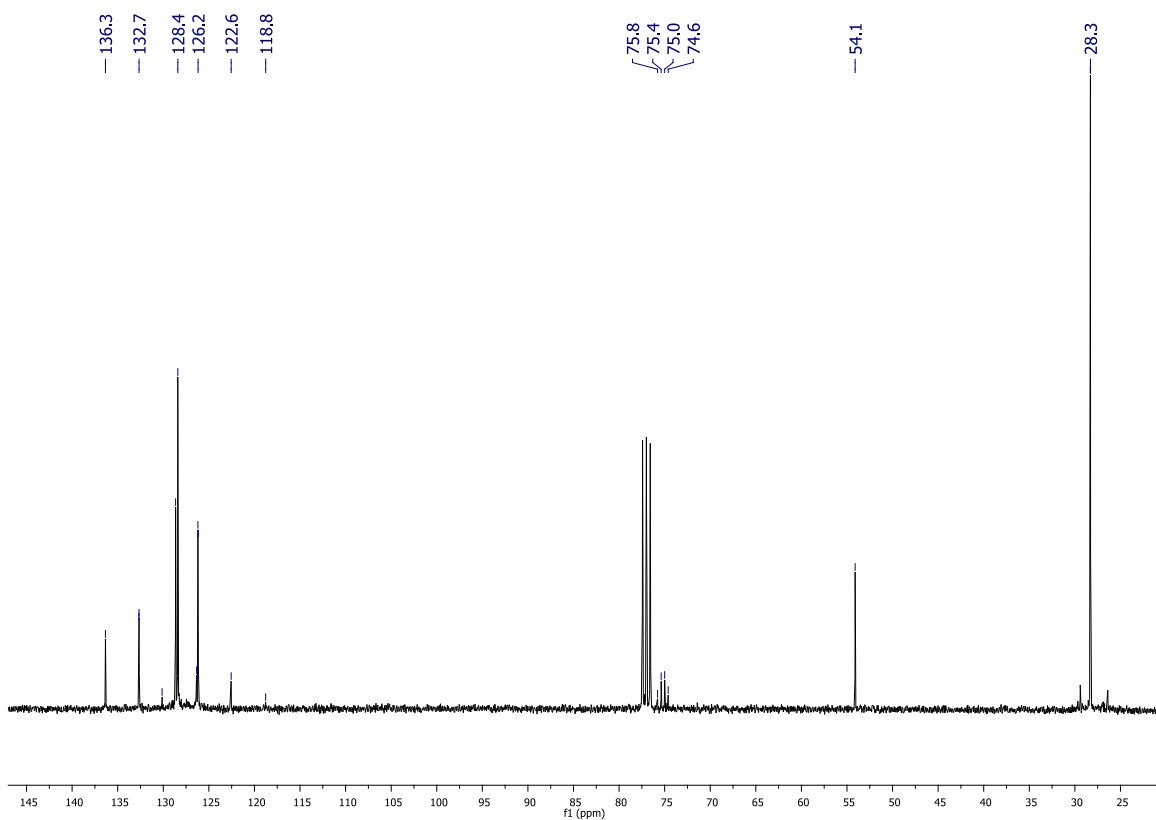

$^1\text{H}$  NMR ( $\text{CDCl}_3$ , 300 MHz) of **8e**

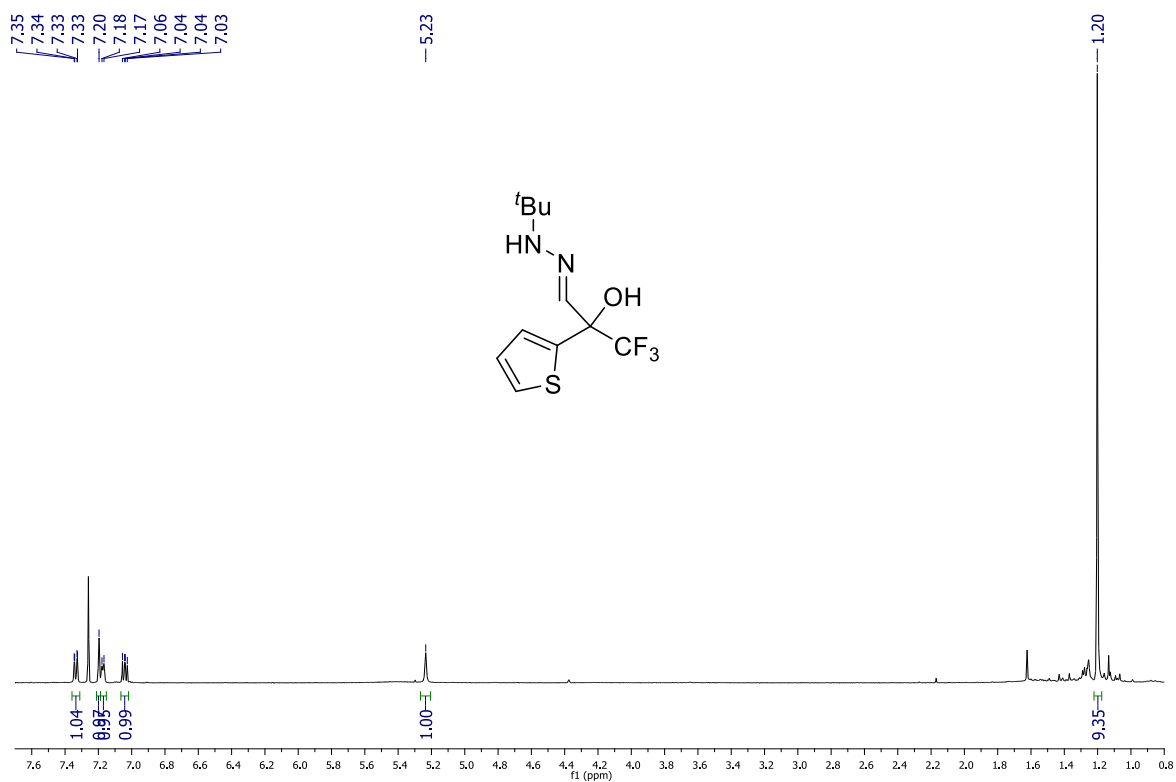

$^{13}\text{C}$  NMR ( $\text{CDCl}_3$ , 75.5 MHz) of **8e**

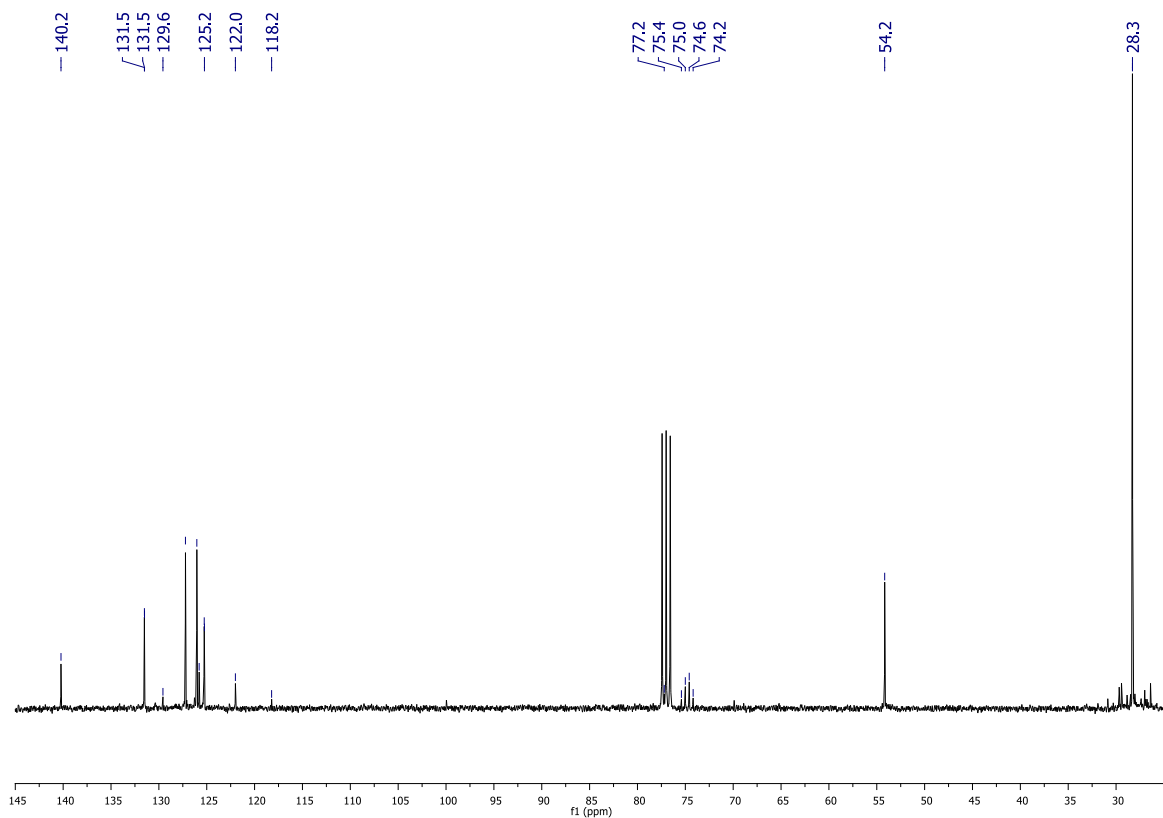

$^1\text{H}$  NMR ( $\text{CDCl}_3$ , 500 MHz) of **8f**

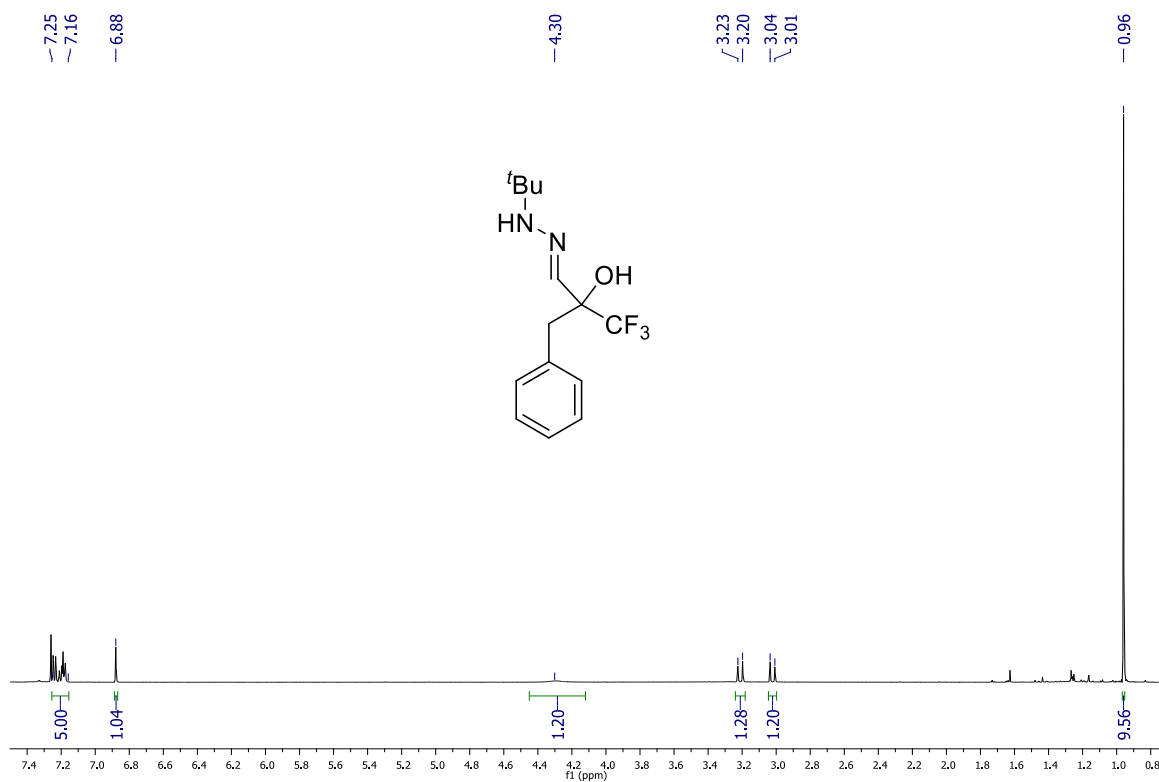

$^{13}\text{C}$  NMR ( $\text{CDCl}_3$ , 75.5 MHz) of **8f**

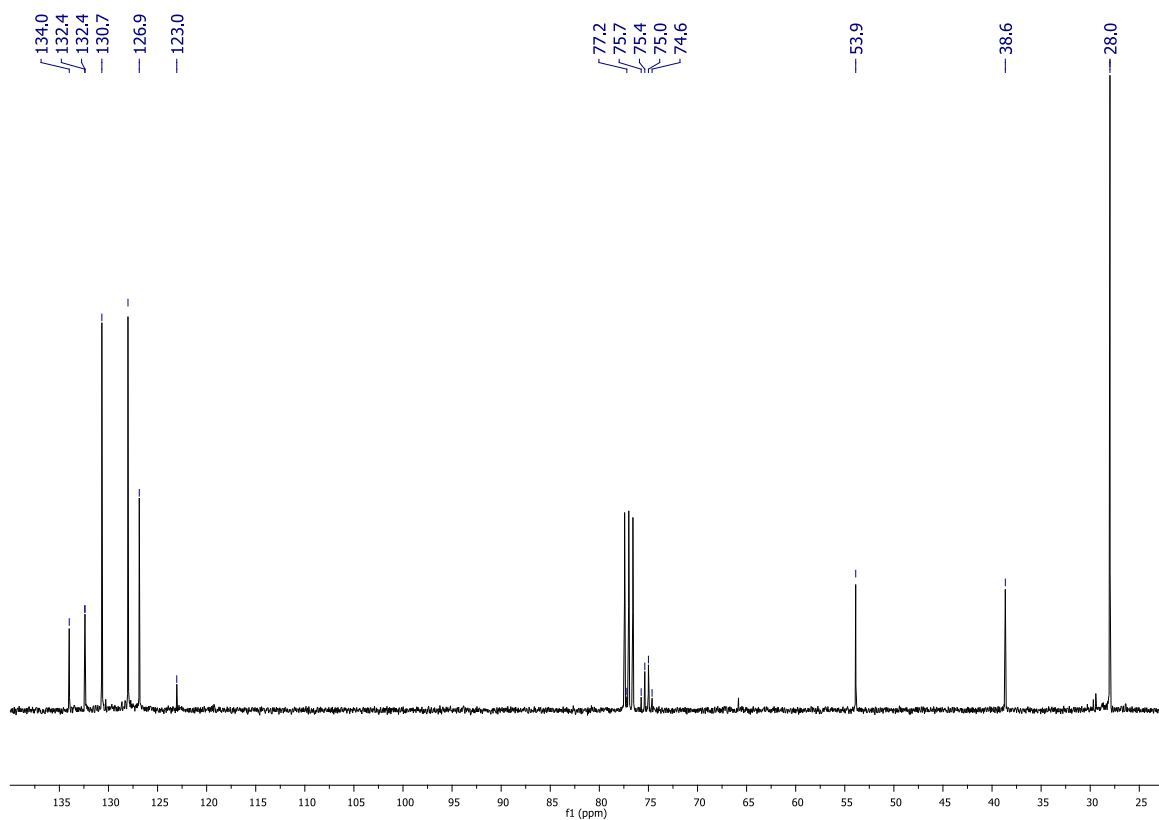

$^1\text{H}$  NMR ( $\text{CDCl}_3$ , 300 MHz) of **9a**

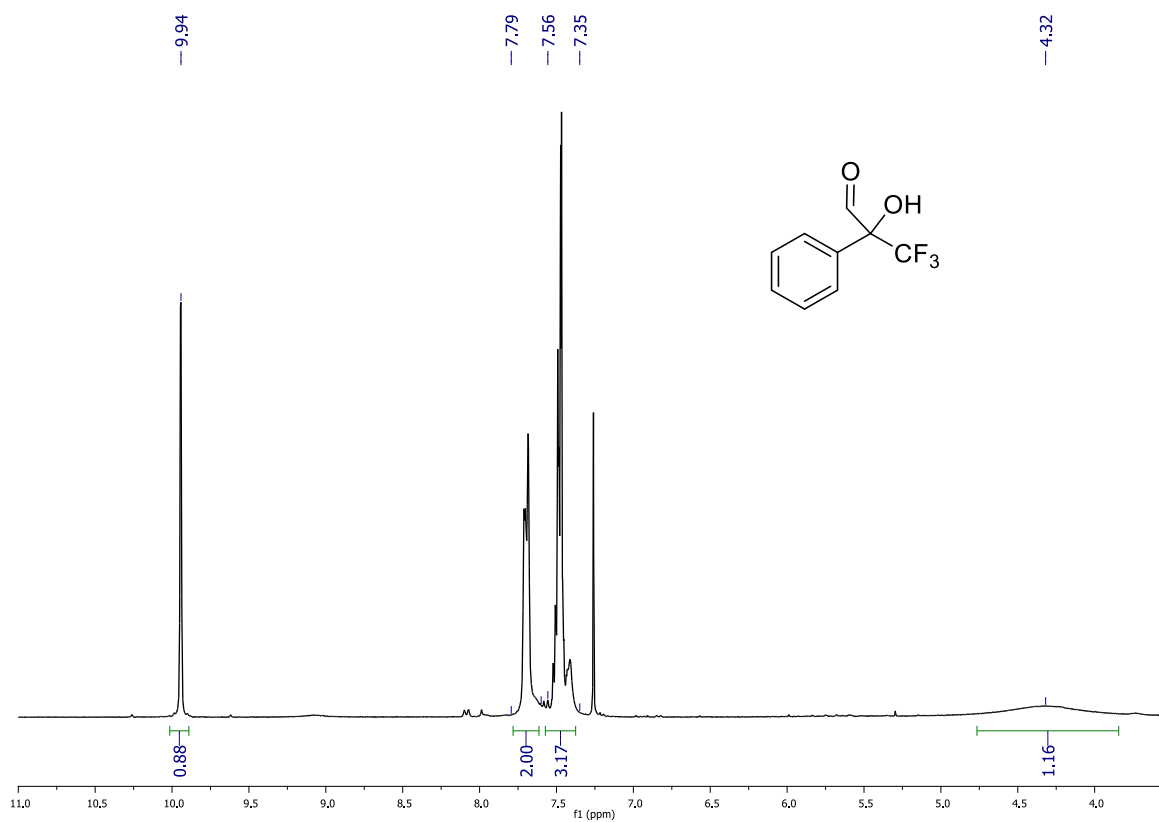

$^1\text{H}$  NMR ( $\text{CDCl}_3$ , 300 MHz) of **9c**

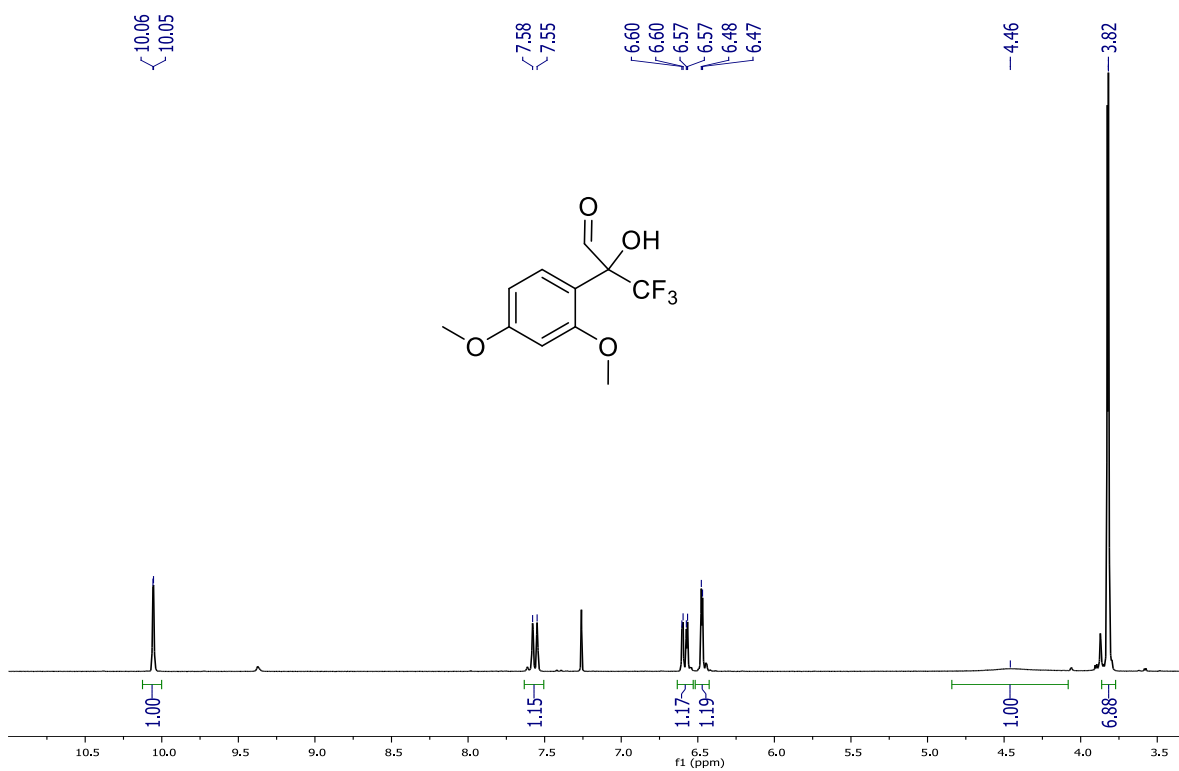

$^1\text{H}$  NMR ( $\text{CDCl}_3$ , 300 MHz) of **10a**

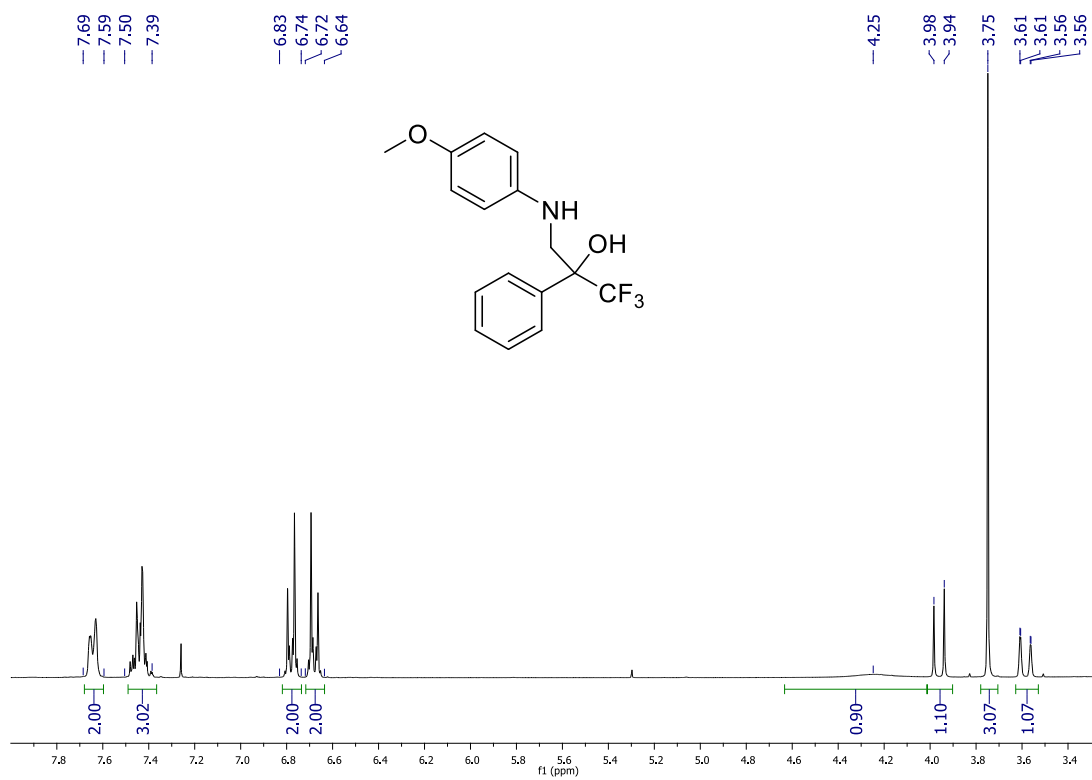

$^{13}\text{C}$  NMR ( $\text{CDCl}_3$ , 75.5 MHz) of **10a**

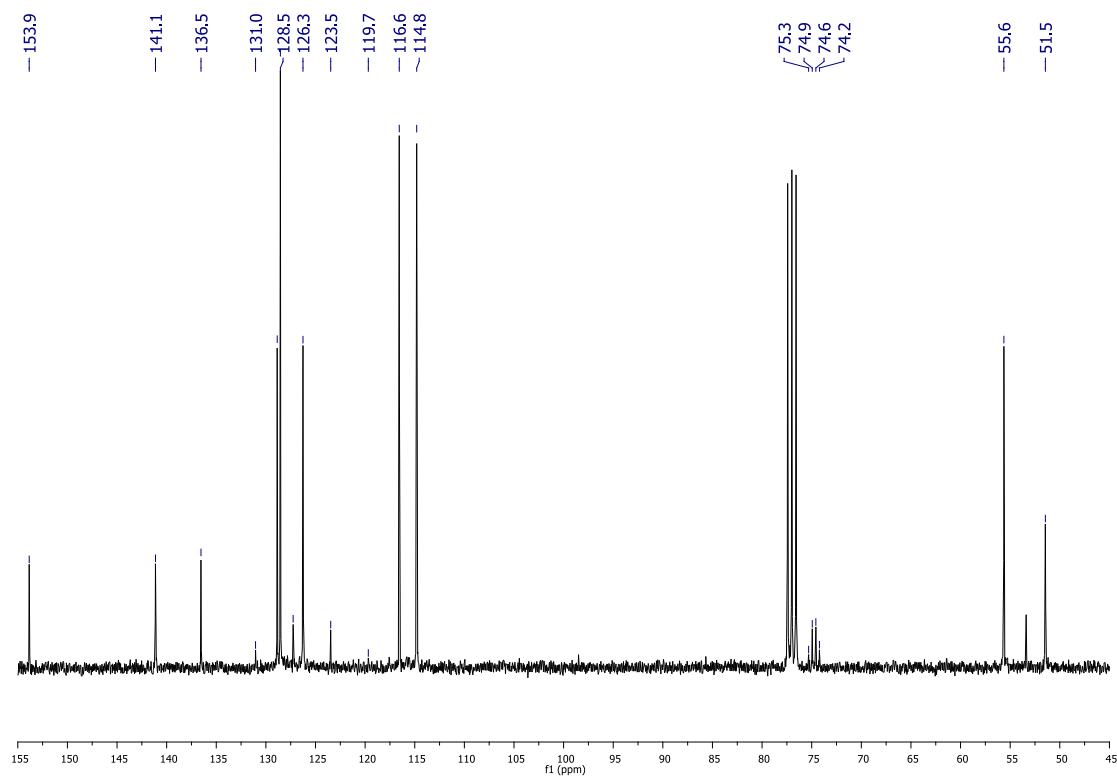

<sup>1</sup>H NMR (CDCl<sub>3</sub>, 300 MHz) of **10c**

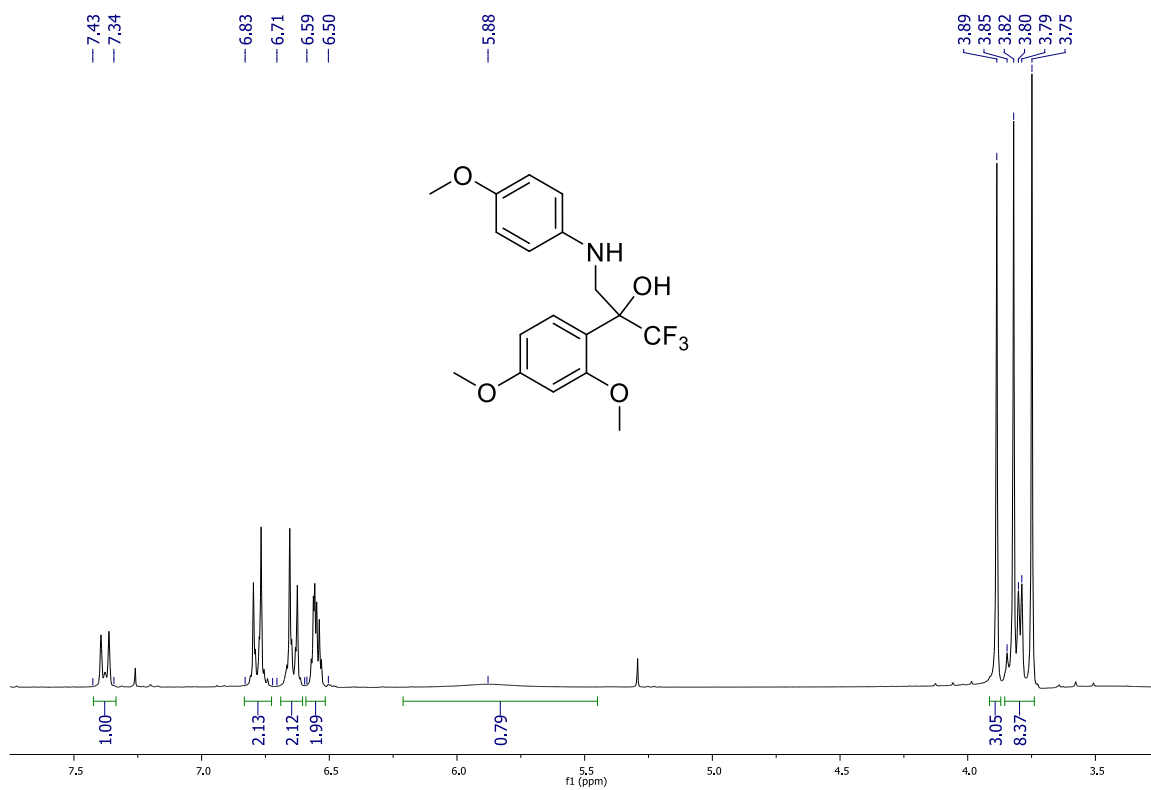

<sup>13</sup>C NMR (CDCl<sub>3</sub>, 75.5 MHz) of **10c**

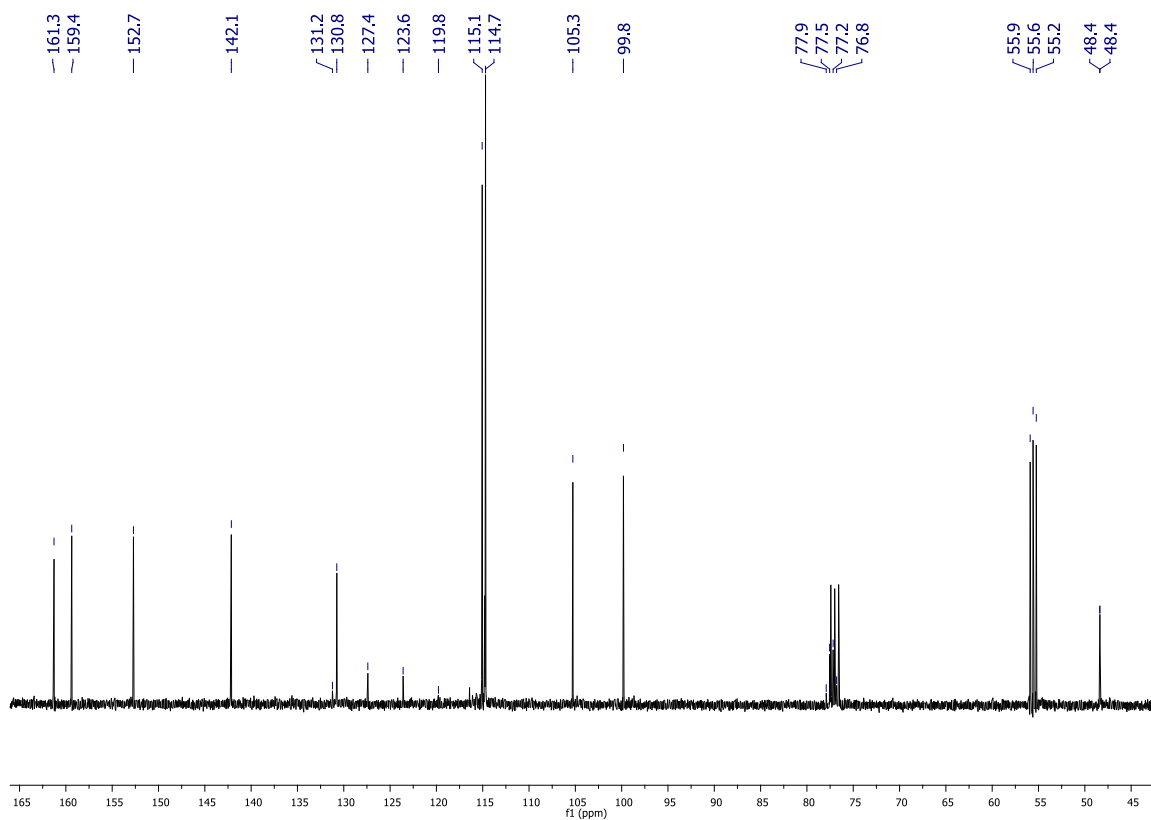

$^1\text{H}$  NMR ( $\text{CDCl}_3$ , 300 MHz) of **10e**

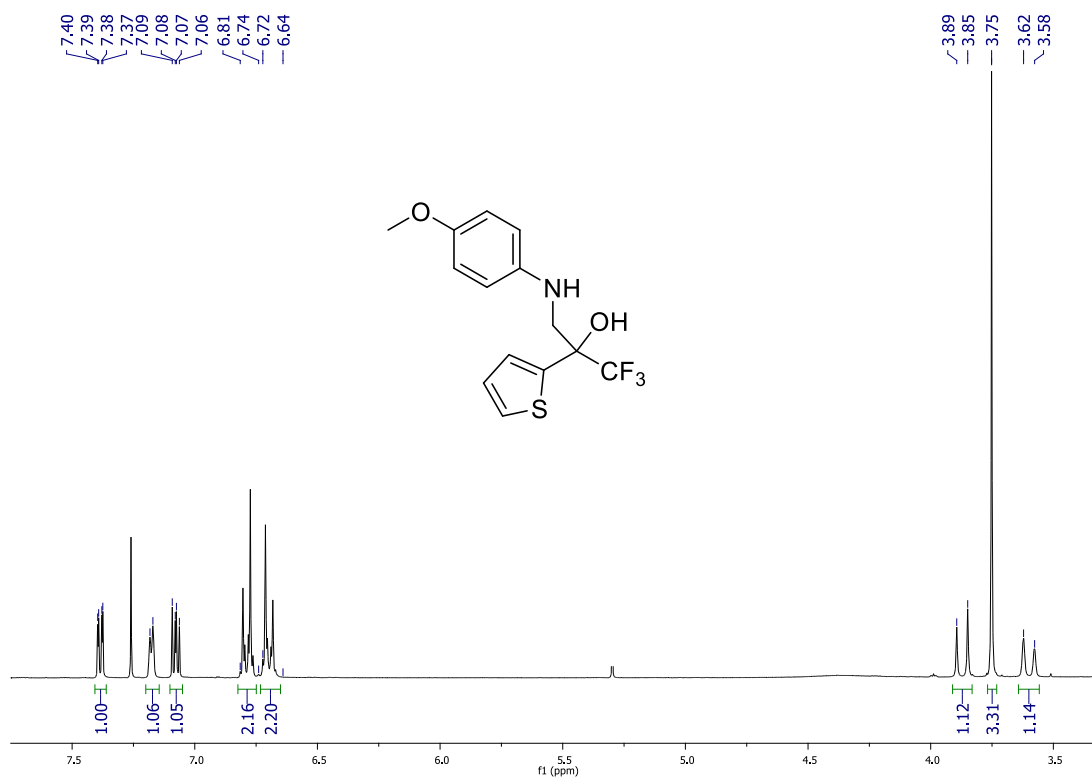

$^{13}\text{C}$  NMR ( $\text{CDCl}_3$ , 75.5 MHz) of **10e**

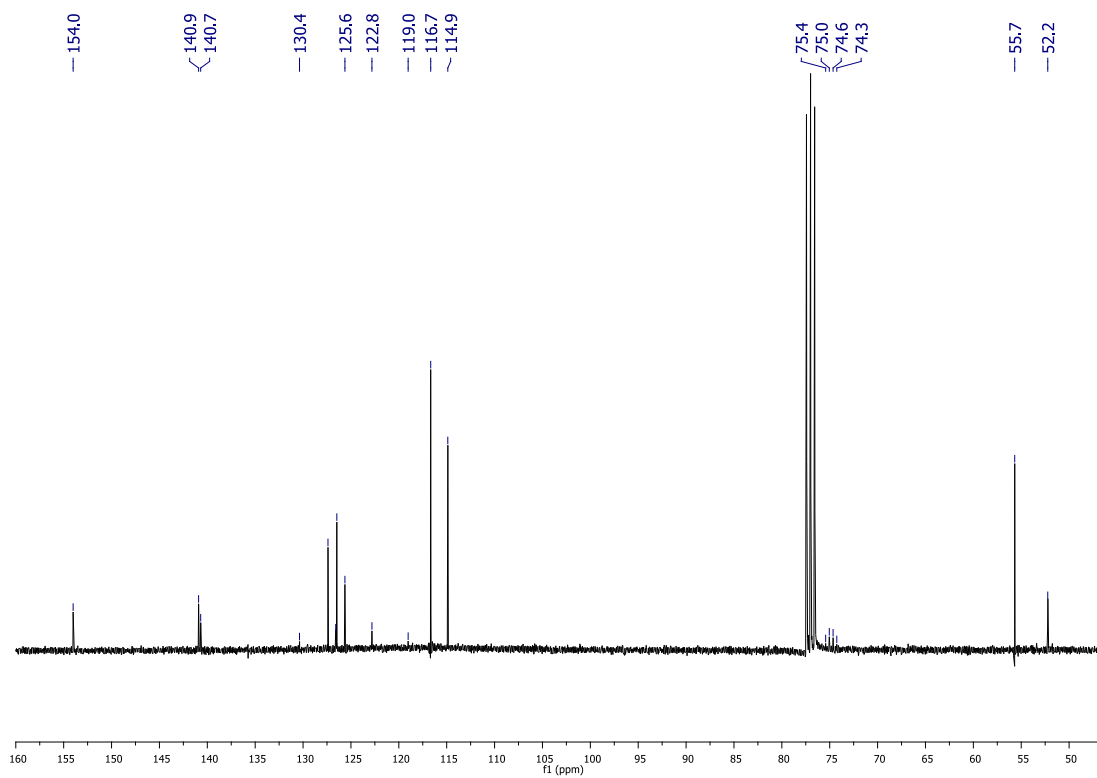

$^1\text{H}$  NMR ( $\text{CDCl}_3$ , 500 MHz) of **10f**

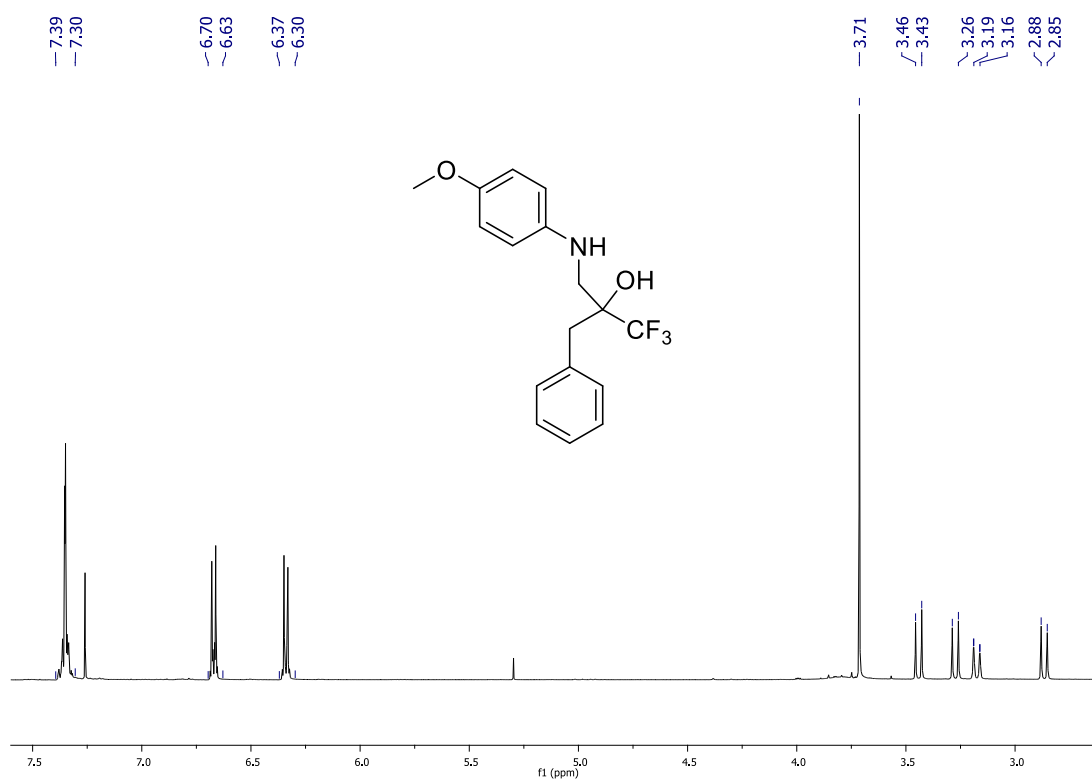

$^{13}\text{C}$  NMR ( $\text{CDCl}_3$ , 75.5 MHz) of **10f**

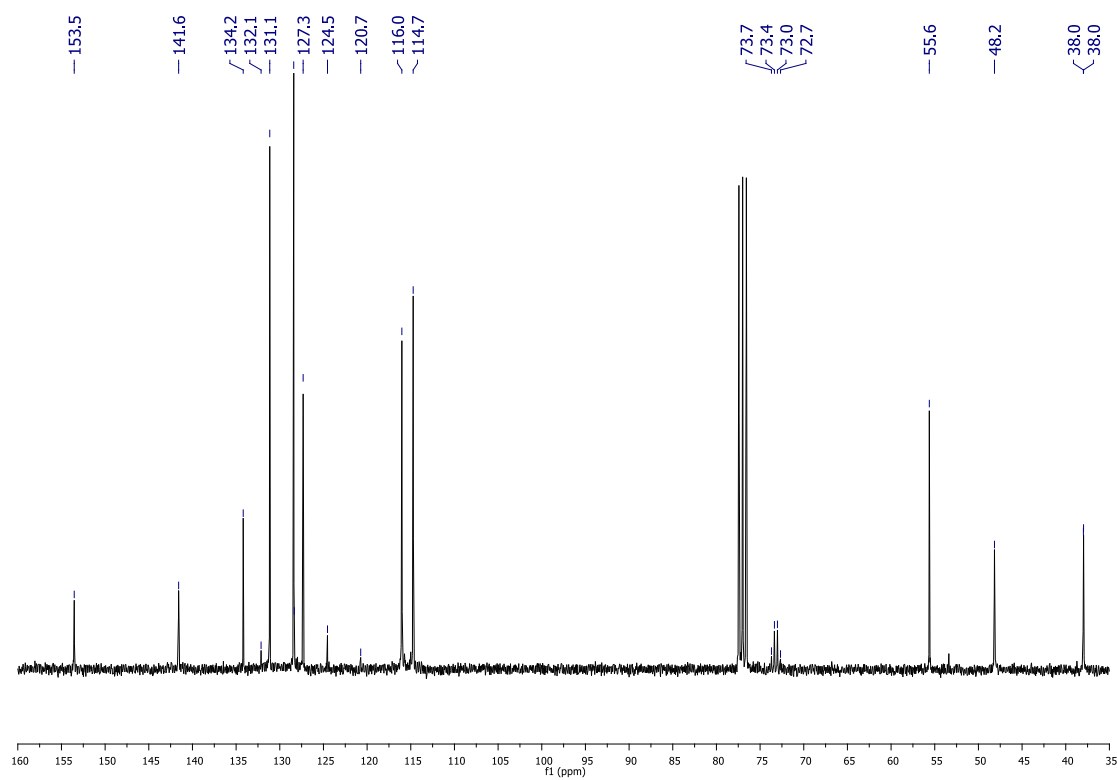

$^1\text{H}$  NMR ( $\text{CDCl}_3$ , 300 MHz) of **10j**

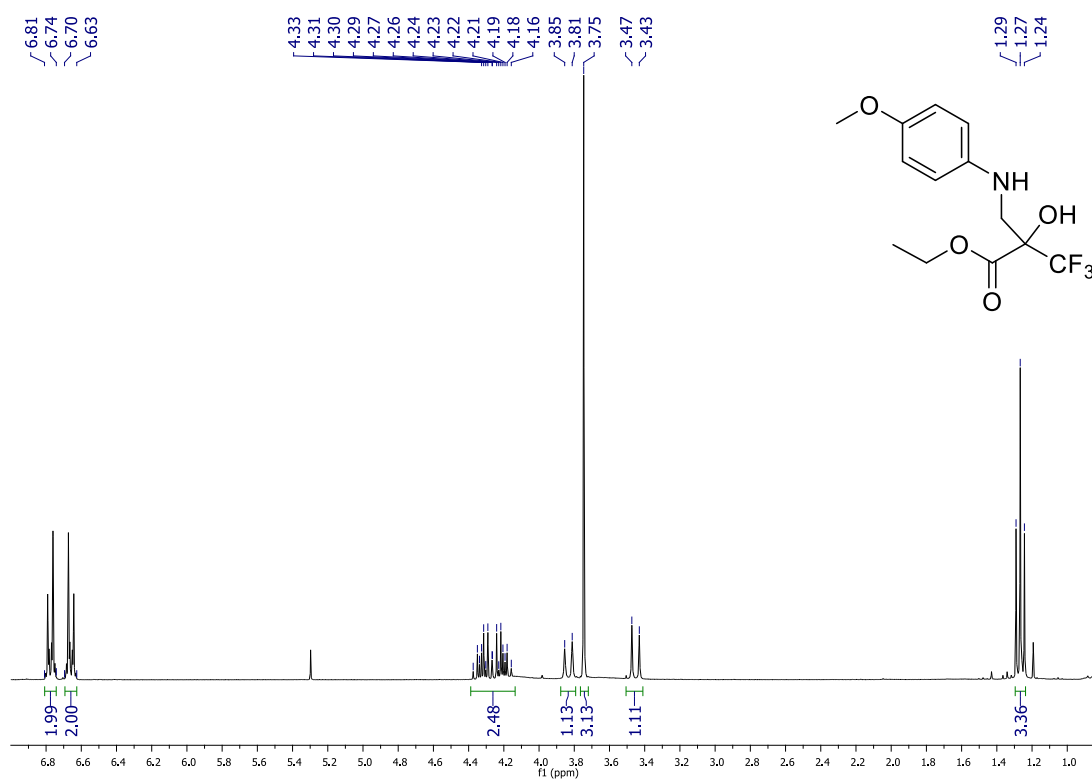

$^{13}\text{C}$  NMR ( $\text{CDCl}_3$ , 75.5 MHz) of **10j**

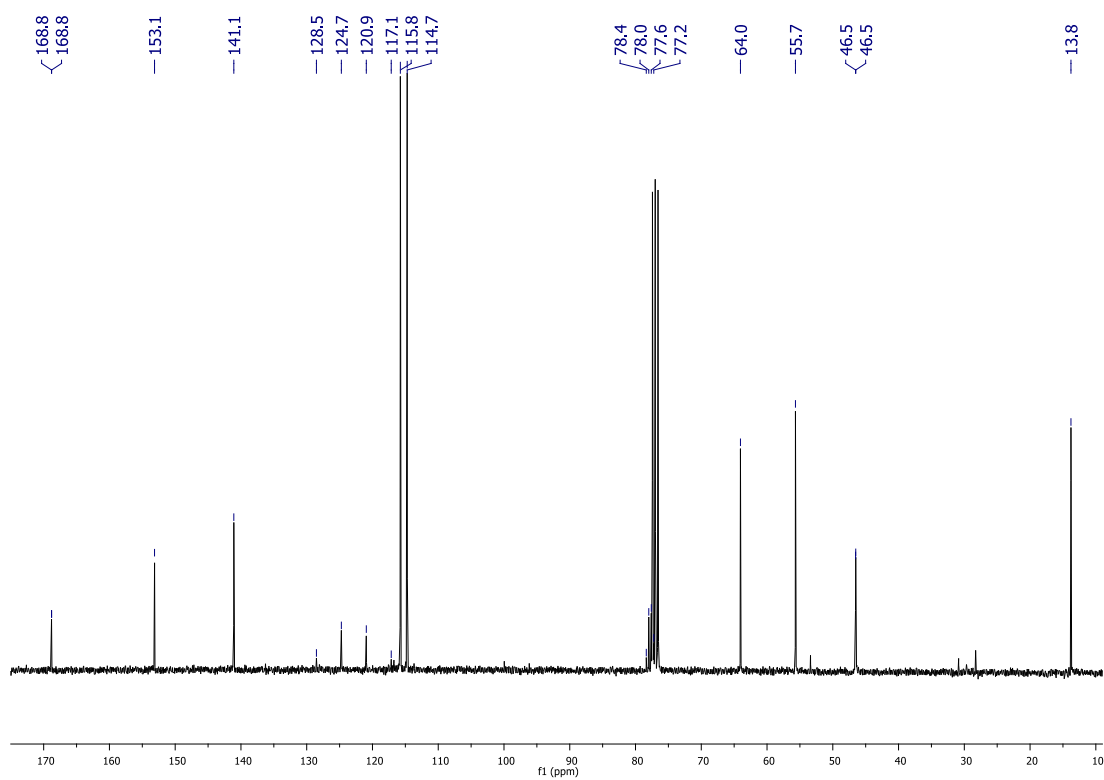

$^1\text{H}$  NMR ( $\text{CDCl}_3$ , 300 MHz) of **11a**

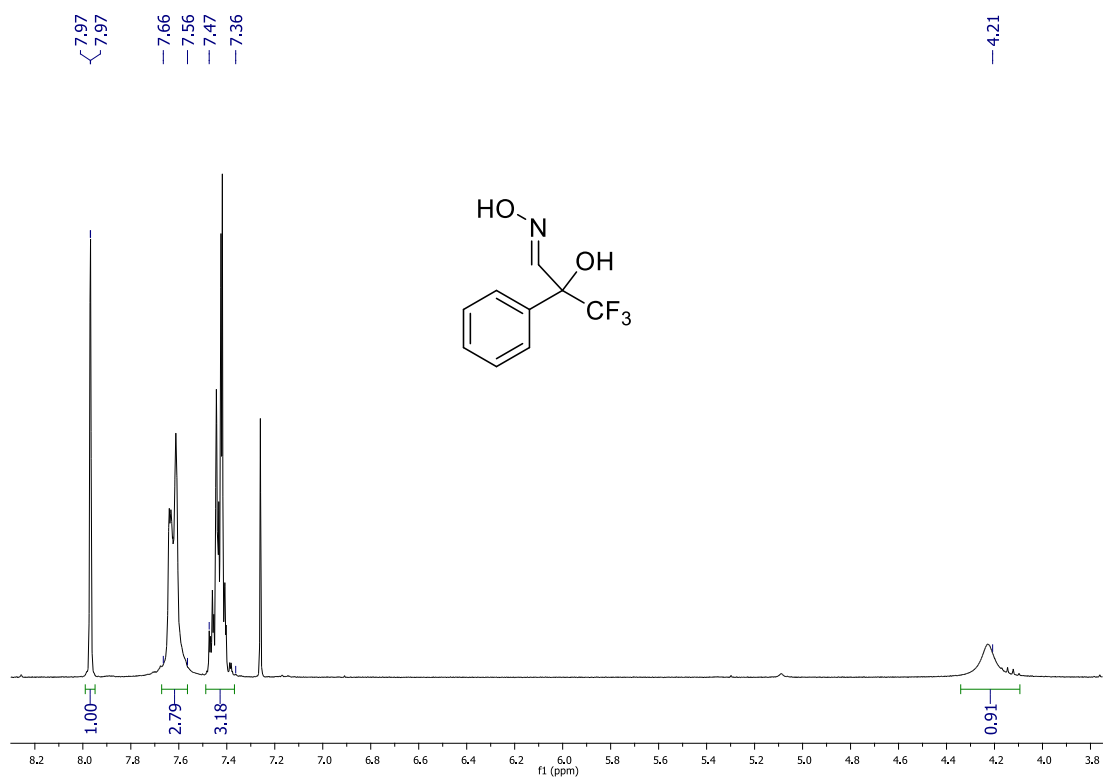

$^{13}\text{C}$  NMR ( $\text{CDCl}_3$ , 75.5 MHz) of **11a**

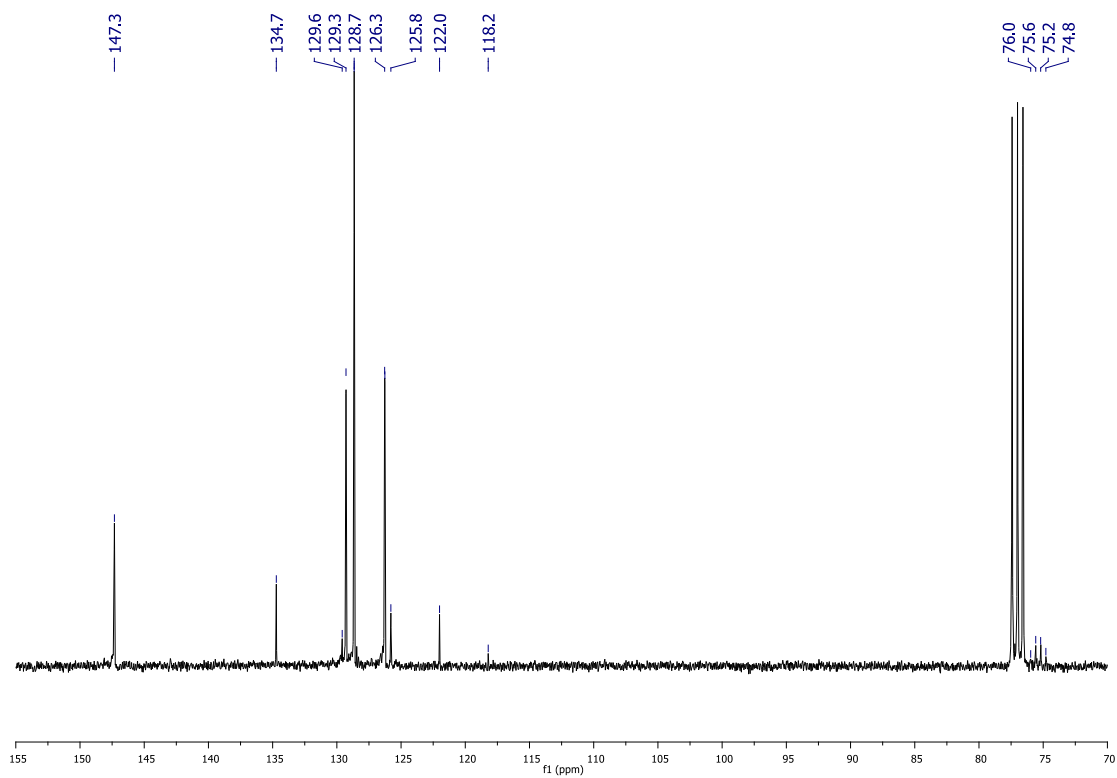

$^1\text{H}$  NMR ( $\text{CDCl}_3$ , 500 MHz) of **11b**

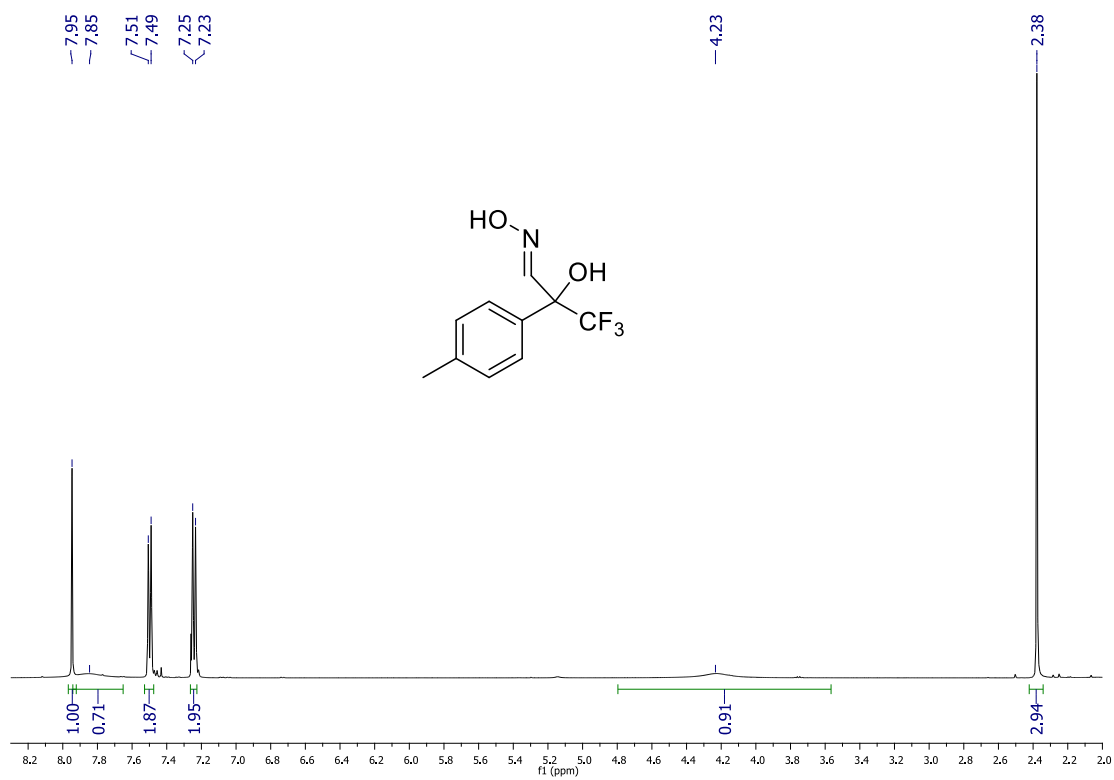

$^{13}\text{C}$  NMR ( $\text{CDCl}_3$ , 75.5 MHz) of **11b**

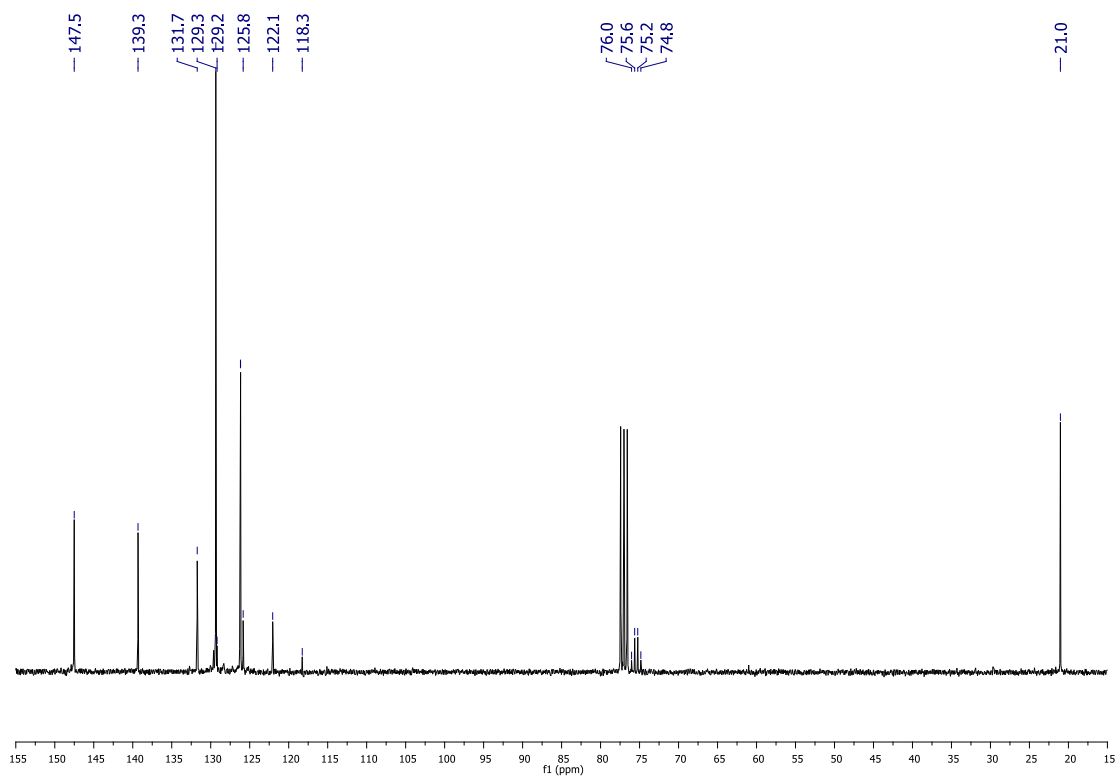

$^1\text{H}$  NMR ( $\text{CO}(\text{CD}_3)_2$ ), 300 MHz) of **11c**

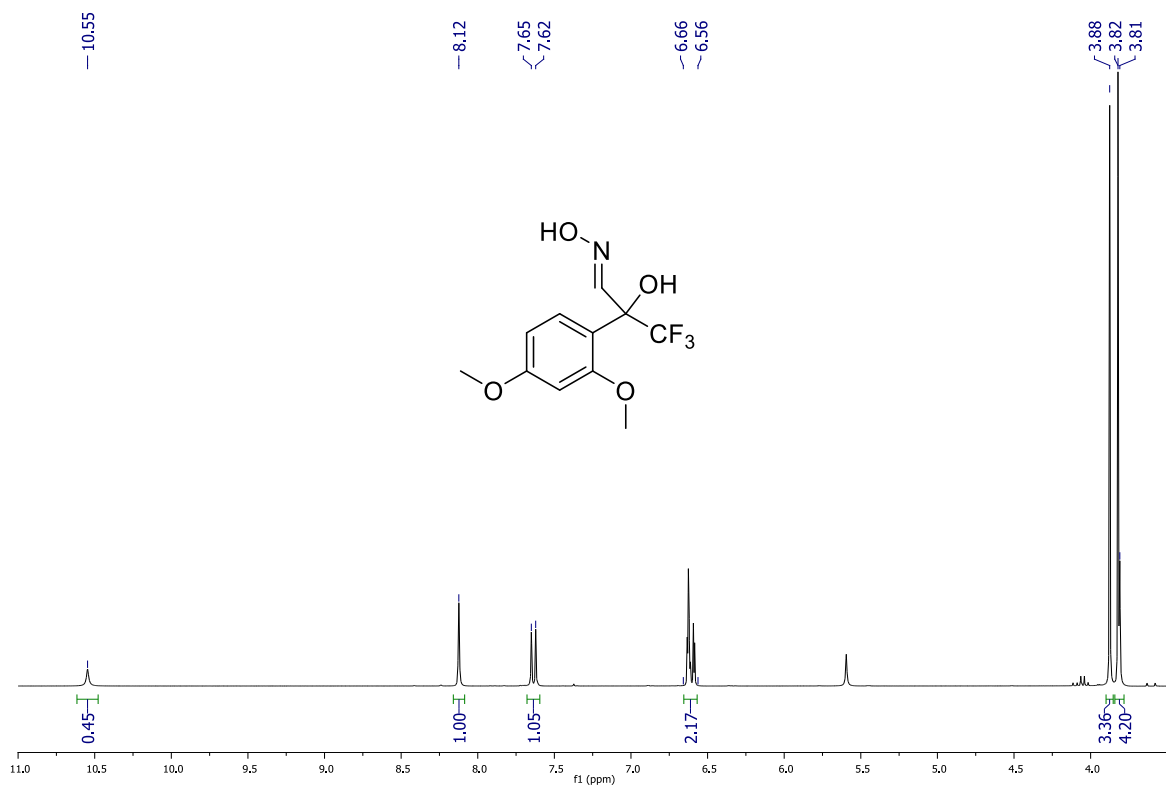

$^{13}\text{C}$  NMR ( $\text{CO}(\text{CD}_3)_2$ ), 75.5 MHz) of **11c**

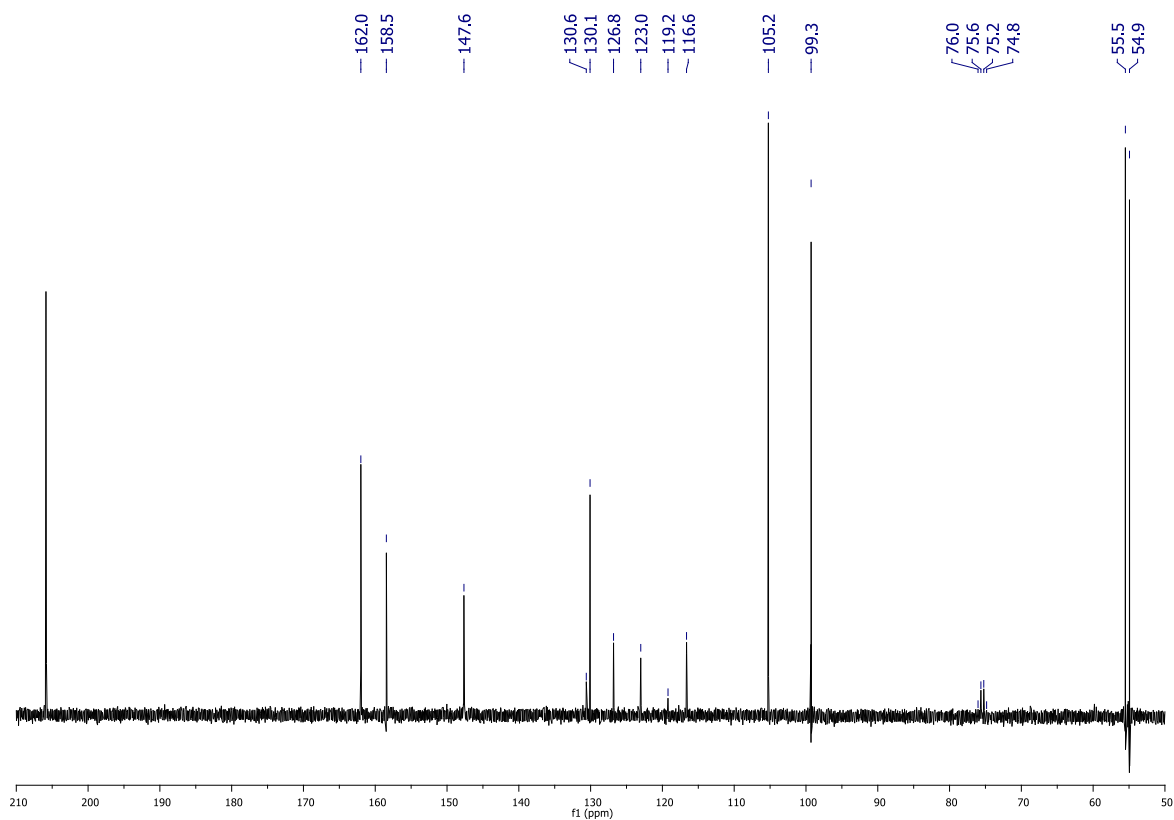

$^1\text{H}$  NMR ( $\text{CDCl}_3$ , 500 MHz) of **11e**

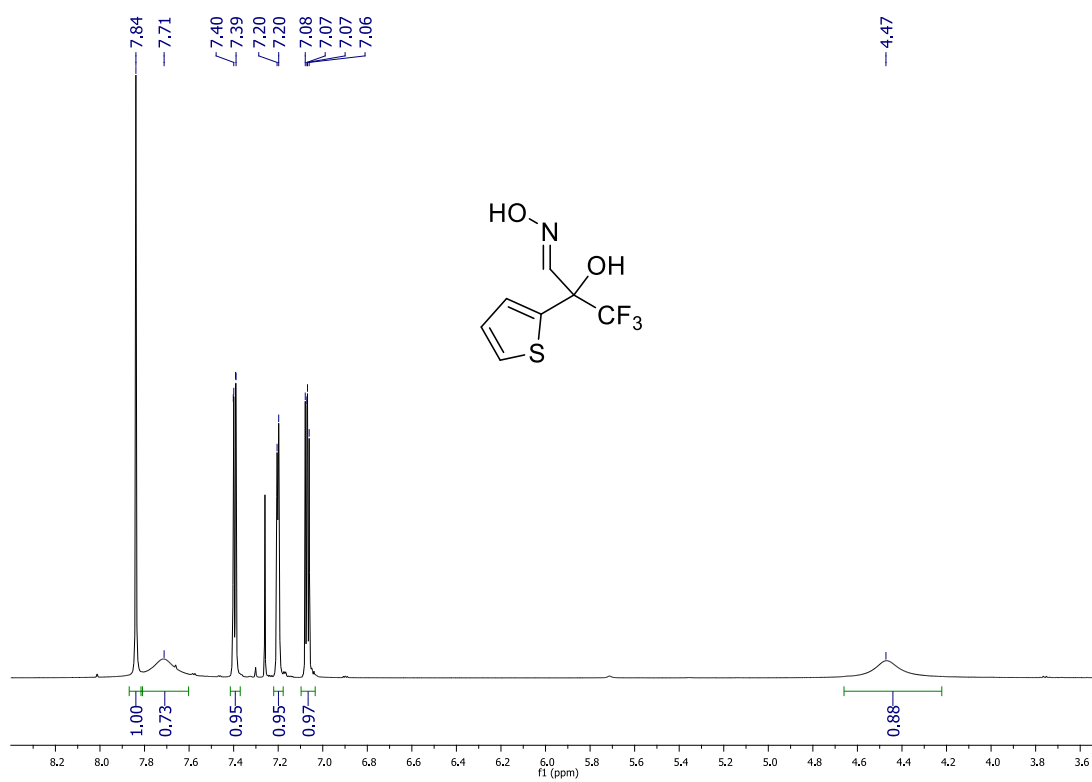

$^{13}\text{C}$  NMR ( $\text{CDCl}_3$ , 75.5 MHz) of **11e**

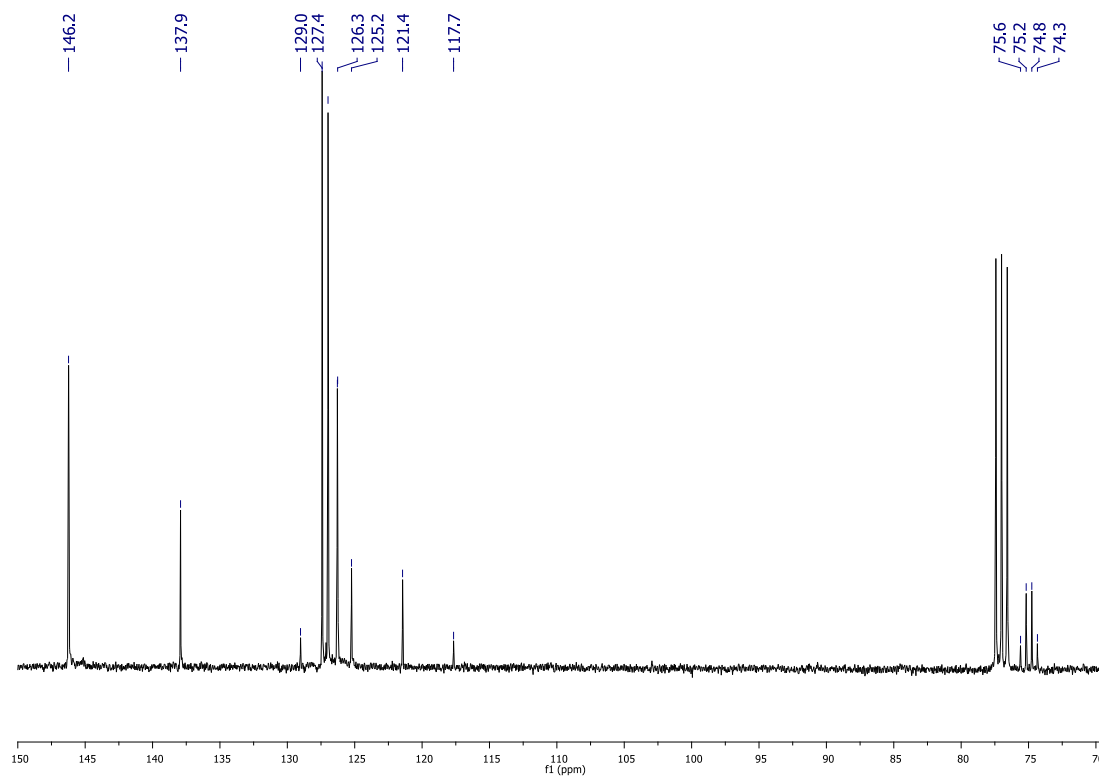

$^1\text{H}$  NMR ( $\text{CDCl}_3$ , 500 MHz) of **11f**

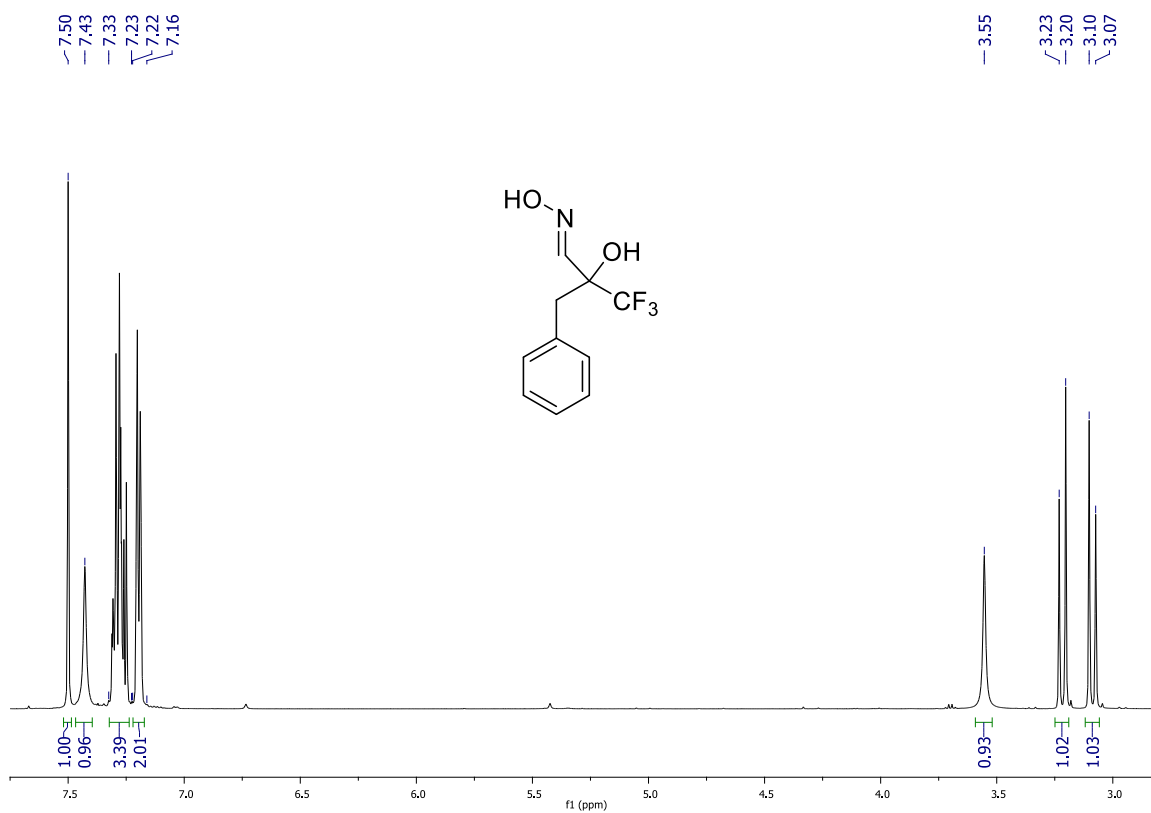

$^{13}\text{C}$  NMR ( $\text{CDCl}_3$ , 75.5 MHz) of **11f**

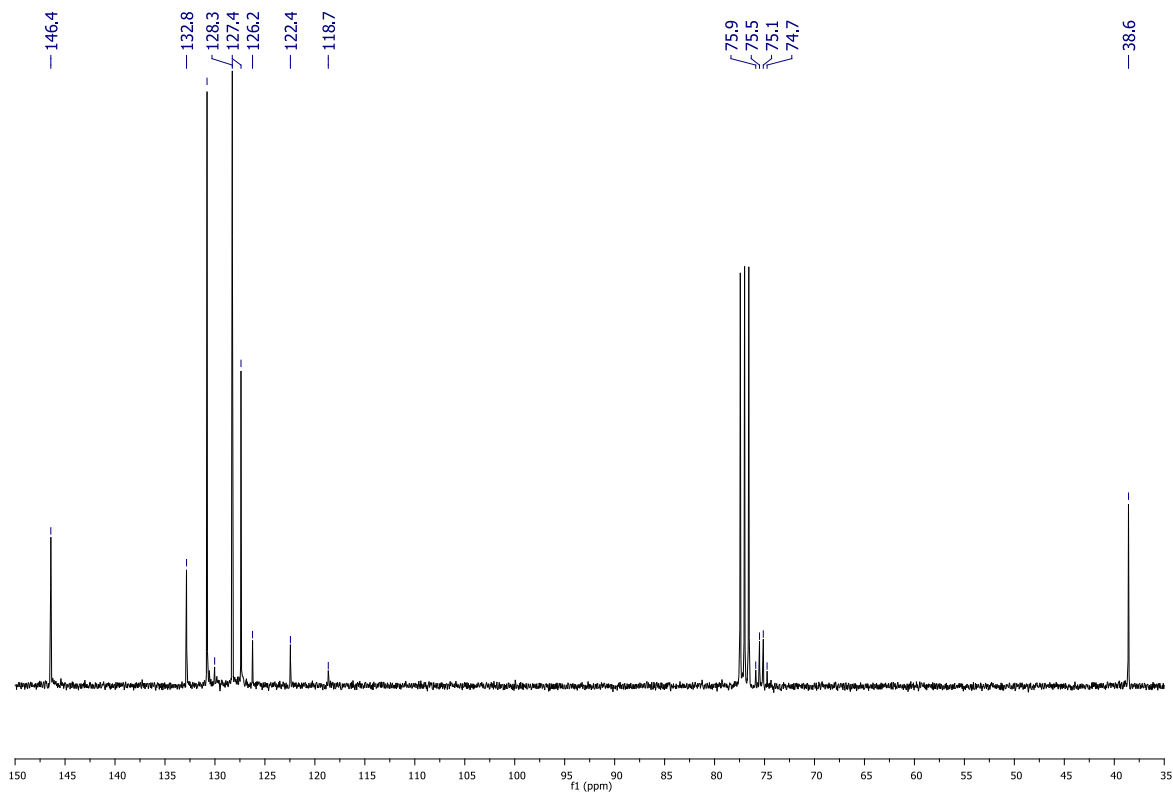

$^1\text{H}$  NMR (DMSO- $d_6$ , 300 MHz) of **10a-HCl**

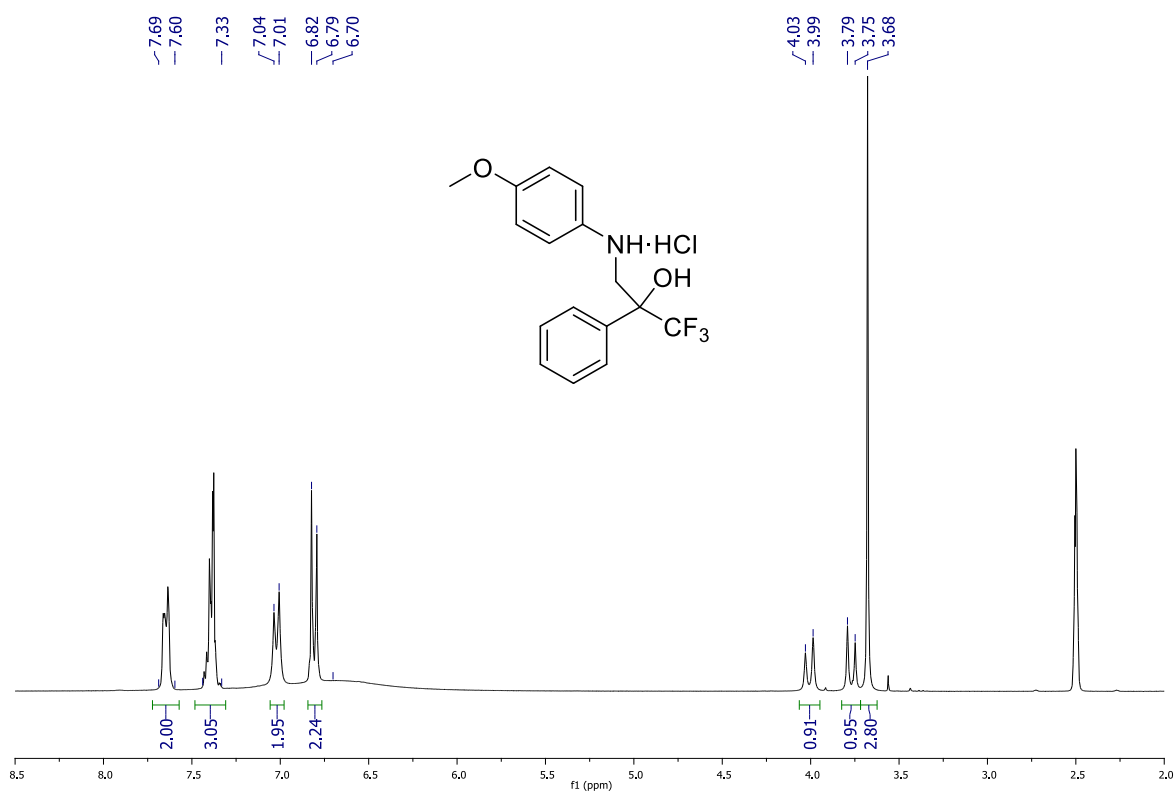

$^{13}\text{C}$  NMR (DMSO- $d_6$ , 75.5 MHz) of **10a-HCl**

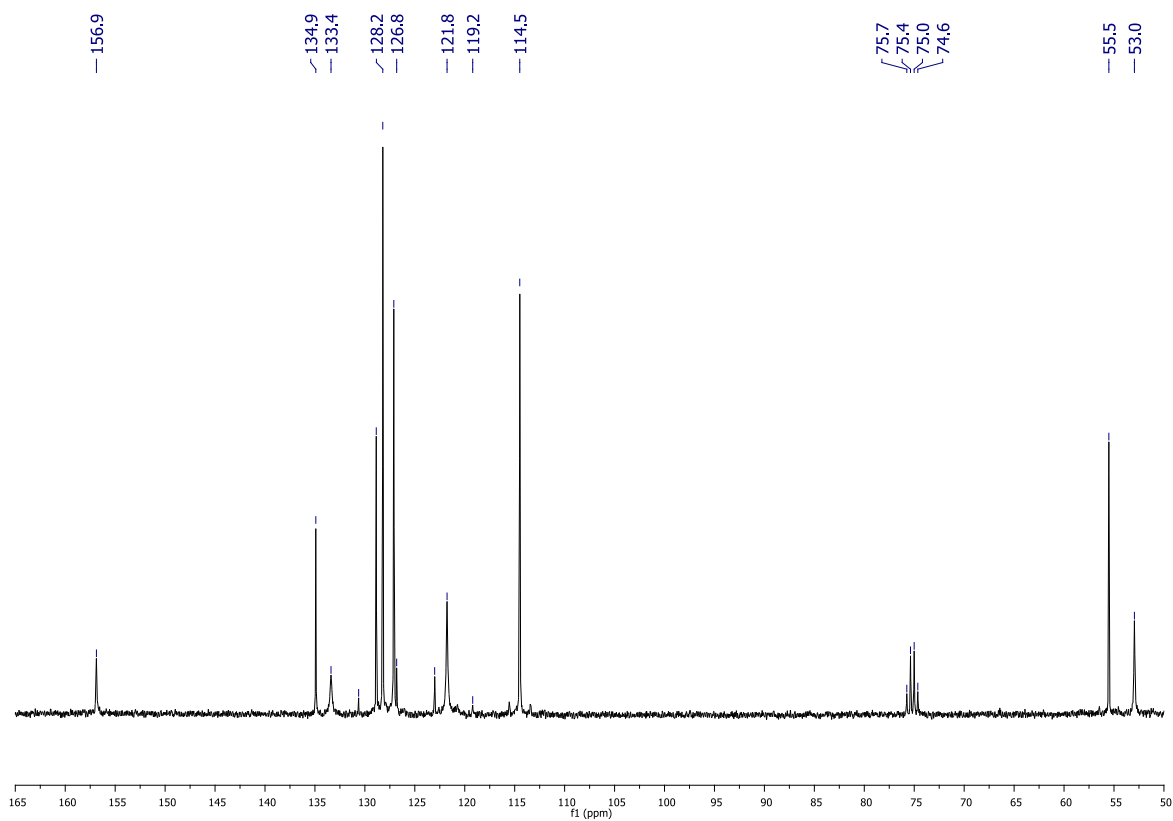

$^1\text{H}$  NMR ( $\text{DMSO-d}_6$ , 300 MHz) of **12a**

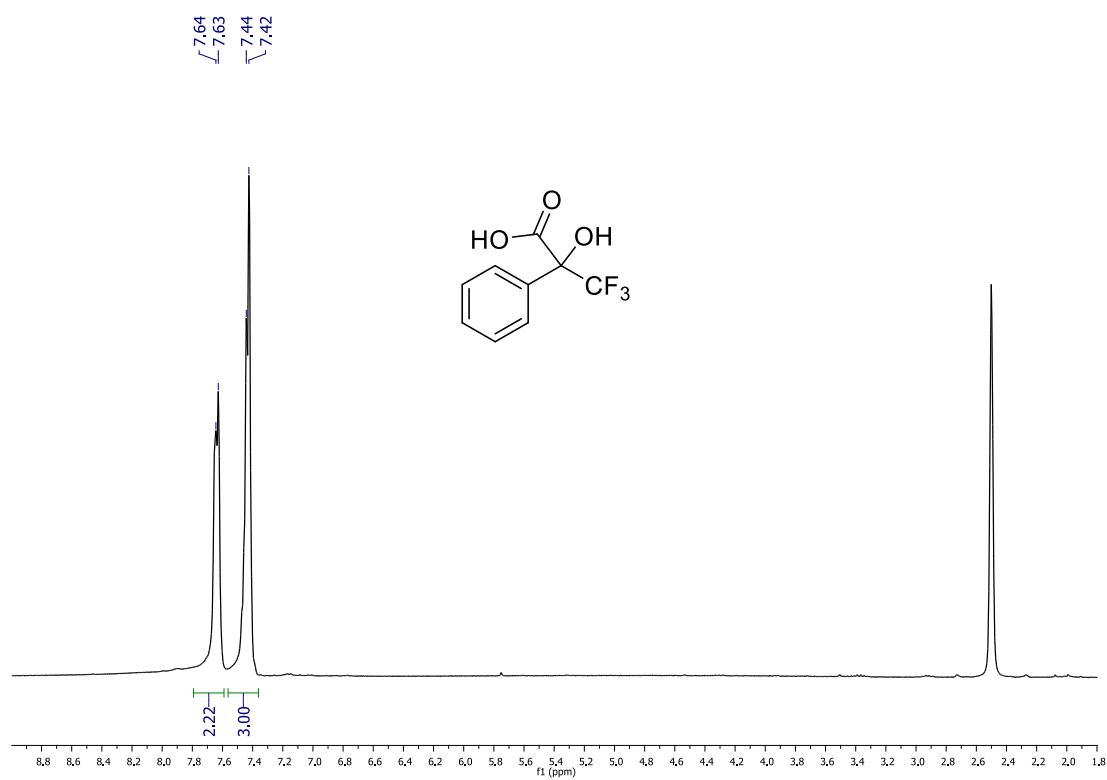

$^1\text{H}$  NMR ( $\text{CDCl}_3$ , 300 MHz) of **III**

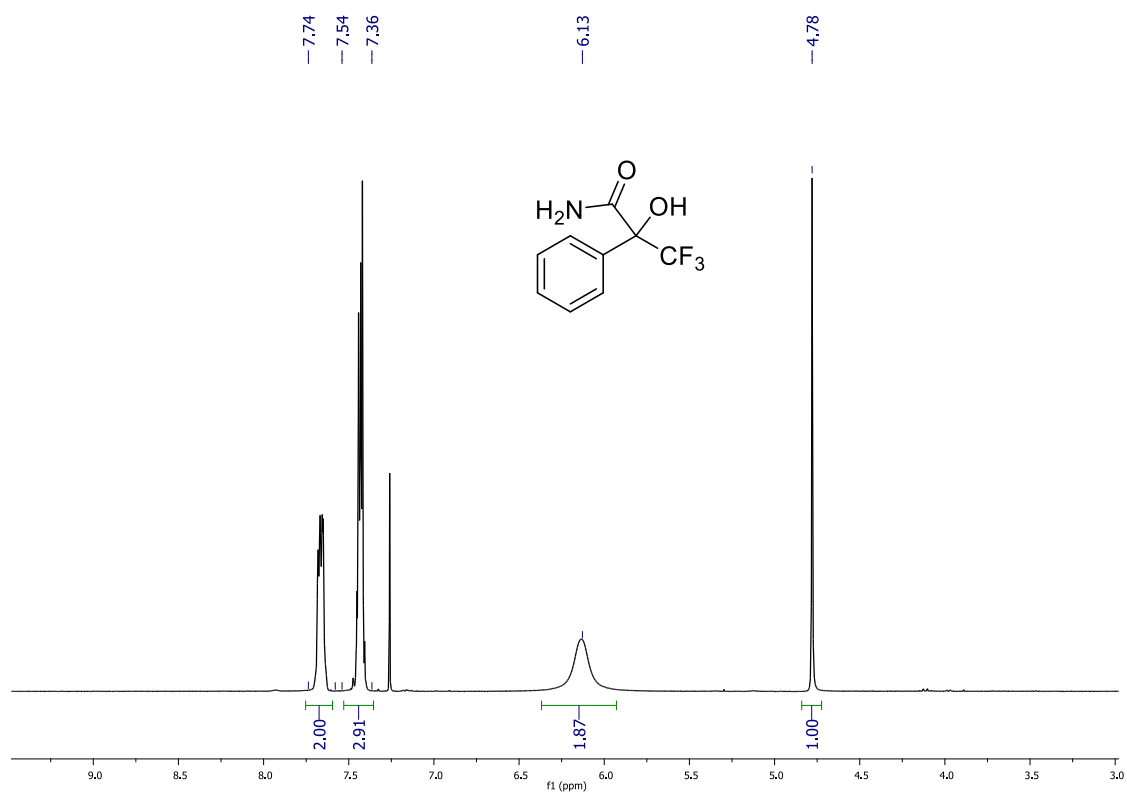

<sup>1</sup>H NMR (Acetone-d<sub>6</sub>, 500 MHz) of **12g**

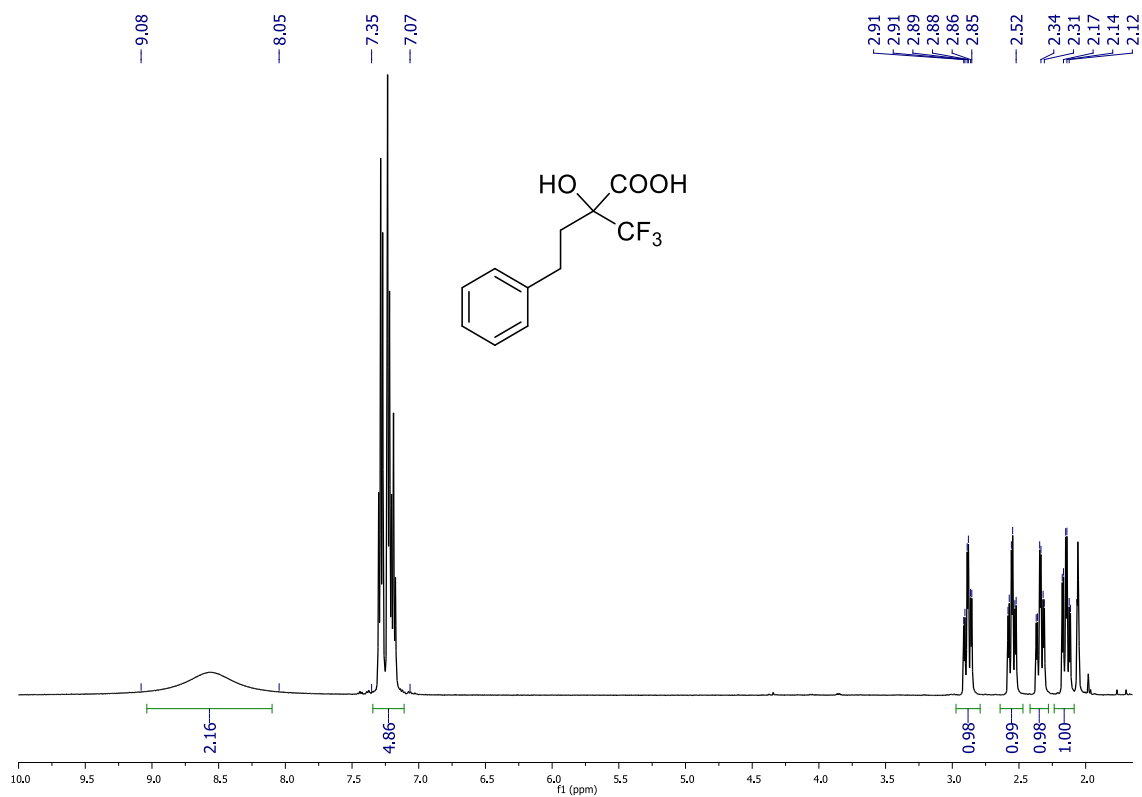

<sup>13</sup>C NMR (Acetone-d<sub>6</sub>, 125 MHz) of **12g**

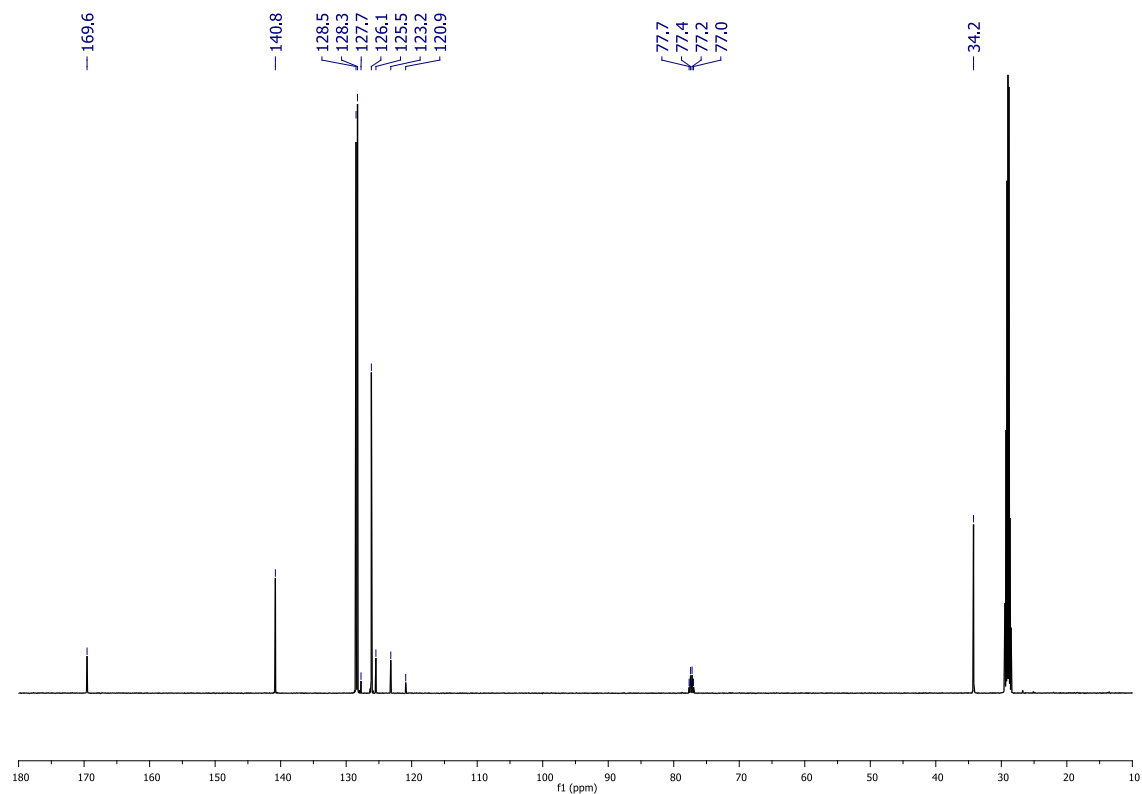

Supplement: c6gc00408c1.pdf [file c6gc00408c1.pdf]
